1                   **A prion accelerates proliferation at the expense of lifespan**

2  
3           David M. Garcia<sup>1,2,+,\*</sup>, Edgar A. Campbell<sup>1,+</sup>, Christopher M. Jakobson<sup>1</sup>, Mitsuhiro  
4           Tsuchiya<sup>3</sup>, Acadia DiNardo<sup>2</sup>, Matt Kaerberlein<sup>3</sup> and Daniel F. Jarosz<sup>1,4,\*</sup>

5  
6   <sup>1</sup>Department of Chemical & Systems Biology, Stanford University School of Medicine,  
7   Stanford, CA, 94305

8   <sup>2</sup>Institute of Molecular Biology, Department of Biology, University of Oregon, Eugene,  
9   OR, 97403

10   <sup>3</sup>Department of Pathology, University of Washington, Seattle , WA, 98195

11   <sup>4</sup>Department of Developmental Biology, Stanford University School of Medicine,  
12   Stanford, CA, 94305

13   +Equal contributions

14   \*Corresponding authors: [dmgarcia@uoregon.edu](mailto:dmgarcia@uoregon.edu) and [jarosz@stanford.edu](mailto:jarosz@stanford.edu)

15 **ABSTRACT**

16 Organisms often commit to one of two strategies: living fast and dying young or living  
17 slow and dying old. In fluctuating environments, however, switching between these two  
18 strategies could be advantageous. Lifespan is often inversely correlated with cell size  
19 and proliferation, which are both limited by protein synthesis. Here we report that a  
20 highly conserved RNA-modifying enzyme, the pseudouridine synthase Pus4/TruB, can  
21 act as a prion, endowing yeast with greater proliferation rates at the cost of a shortened  
22 lifespan. Cells harboring the prion can grow larger and exhibit altered protein synthesis.  
23 This epigenetic state, [*BIG*<sup>+</sup>] (better in growth), allows cells to heritably yet reversibly  
24 alter their translational program, leading to the differential expression of hundreds of  
25 proteins, including many that regulate proliferation and aging. Our data reveal a  
26 functional role for aggregation of RNA-modifying enzymes in driving heritable epigenetic  
27 states that transform cell growth and survival.

## 28 **Introduction**

29 Cell size and proliferation are fundamental determinants of development, survival, and  
30 disease (Su and O'Farrell, 1998). Although these features can be independently  
31 controlled, coupling is common due to their dependence on the same biochemical  
32 building blocks (Su and O'Farrell, 1998; Turner et al., 2012). Growth and proliferation  
33 also impact lifespan across eukaryotes (Fontana et al., 2010; Kenyon, 2010; Pitt and  
34 Kaeberlein, 2015). The importance of tightly controlling each of these properties is  
35 underscored by the many mutations affecting growth and proliferation that are  
36 pathogenic, leading to cancer, developmental abnormalities, and myriad diseases of  
37 age (reviewed in (Hanahan and Weinberg, 2011; Saxton and Sabatini, 2017)).

38 Organisms commonly alter the relationship between cell growth and proliferation  
39 during the course of development (Su and O'Farrell, 1998). In oocytes of *Drosophila*  
40 *melanogaster*, for example, a massive expansion in cytoplasmic volume without cellular  
41 division precedes a later step of numerous cellular divisions without cytoplasmic growth.  
42 The rates of cell growth and proliferation can be strongly coupled to nutrient sensing  
43 and to changes in metabolism (Efeyan et al., 2015; Turner et al., 2012). Thus,  
44 organisms can use genetically encoded signaling pathways to commit to different  
45 strategies depending on both their needs and their environment (Ivanov et al., 2015;  
46 Jung et al., 2018). Epigenetic tuning of cell growth and proliferation could in principle  
47 provide a stable yet reversible mechanism to alter the relationship between growth and  
48 proliferation according to differing needs in fluctuating environments. Histone  
49 modifications can enable such adaptation in a way that can be heritable over several

50 mitotic divisions. However, apart from a few notable exceptions (Catania et al., 2020;  
51 Grewal and Klar, 1996; Nakayama et al., 2000), the majority of studied examples are  
52 erased during meiosis (Heard and Martienssen, 2014; Moazed, 2011).

53 Prions are a distinct class of epigenetic mechanism that can be faithfully  
54 transmitted through both mitotic and meiotic cell divisions (Brown and Lindquist, 2009;  
55 Cox, 1965; Garcia and Jarosz, 2014; Wickner, 1994). The unusual folding landscape of  
56 prion proteins, which allows the recruitment of proteins from the naïve to the prion fold,  
57 promotes a mode of inheritance that is both stable and reversible (Chakrabortee et al.,  
58 2016a; McKinley et al., 1983). For example, transient perturbations in molecular  
59 chaperone activity (Brown and Lindquist, 2009; Chernoff et al., 1995), specific  
60 environmental stressors (Garcia et al., 2016; Singh et al., 1979; Tuite et al., 1981), or  
61 regulated proteolysis (Ali et al., 2014; Kabani et al., 2014) can induce or eliminate prion  
62 states. It is now appreciated that this form of information transfer is far more common  
63 than previously realized (Chakrabortee et al., 2016b; Halfmann et al., 2012; Yuan and  
64 Hochschild, 2017).

65 Here we investigate the inheritance of a prion-based epigenetic state that alters  
66 yeast cell physiology, potentiating a tradeoff between proliferation and lifespan. We first  
67 describe the  $[BIG^+]$  prion—driven by the conserved pseudouridine synthase Pus4  
68 (known as TruB in mammals and bacteria)—which increases proliferation but shortens  
69 lifespan. We then quantitatively model the adaptive value of this *'live fast, die young'*  
70 growth strategy in fluctuating environments.  $[BIG^+]$  cells are larger and exhibit increased  
71 protein synthesis, as well as increased pseudouridylation activity. Finally, we find

72 evidence for analogous epigenetic control of cell size in wild yeast populations. The  
73 epigenetic inheritance of an altered form of an RNA-modifying enzyme over long  
74 biological timescales, as occurs in [*BIG*<sup>+</sup>], thus provides a mechanism through which  
75 short-lived epigenetic modifications of nucleic acid can be perpetuated across  
76 generations.

77

## 78 **RESULTS**

### 79 **Cells bearing a prion-like epigenetic element live fast and die young**

80 We recently discovered more than 40 protein-based epigenetic elements in  
81 *Saccharomyces cerevisiae* that are both heritable and reversible upon transient  
82 perturbation of protein chaperone function (Chakrabortee et al., 2016a). Many of the  
83 proteins that underlie this behavior have the potential to regulate growth. One of these  
84 epigenetic states was induced by transient overexpression of the highly conserved  
85 pseudouridine synthase *PUS4/TRUB*, which catalyzes formation of a ubiquitous  
86 pseudouridine on U55 in tRNAs in bacteria, yeast and humans (Becker et al., 1997;  
87 Gutgsell et al., 2000; Zucchini et al., 2003). Mutation of U55 leads to large fitness  
88 deficits, second only to mutations in the tRNA anticodon loop, highlighting the functional  
89 importance of this nucleotide (Li et al., 2016). Mutation of U55 is also linked to deafness  
90 and diabetes in humans (Wang et al., 2016). We originally discovered this epigenetic  
91 state because transient overexpression of *PUS4* led to an enduring and heritable  
92 growth improvement in medium containing zinc sulfate (Chakrabortee et al., 2016a).  
93 Upon closer examination, we noticed that cells harboring the Pus4-induced element

94 also achieved up to a ~60% faster maximal proliferation rate than naïve cells in  
95 standard rich medium (YPD; **Fig. 1A**,  $p=0.0095$ , unpaired t-test). We therefore initially  
96 named this mitotically heritable element “Big<sup>+</sup>”, for better in growth, on the basis of its  
97 phenotype.

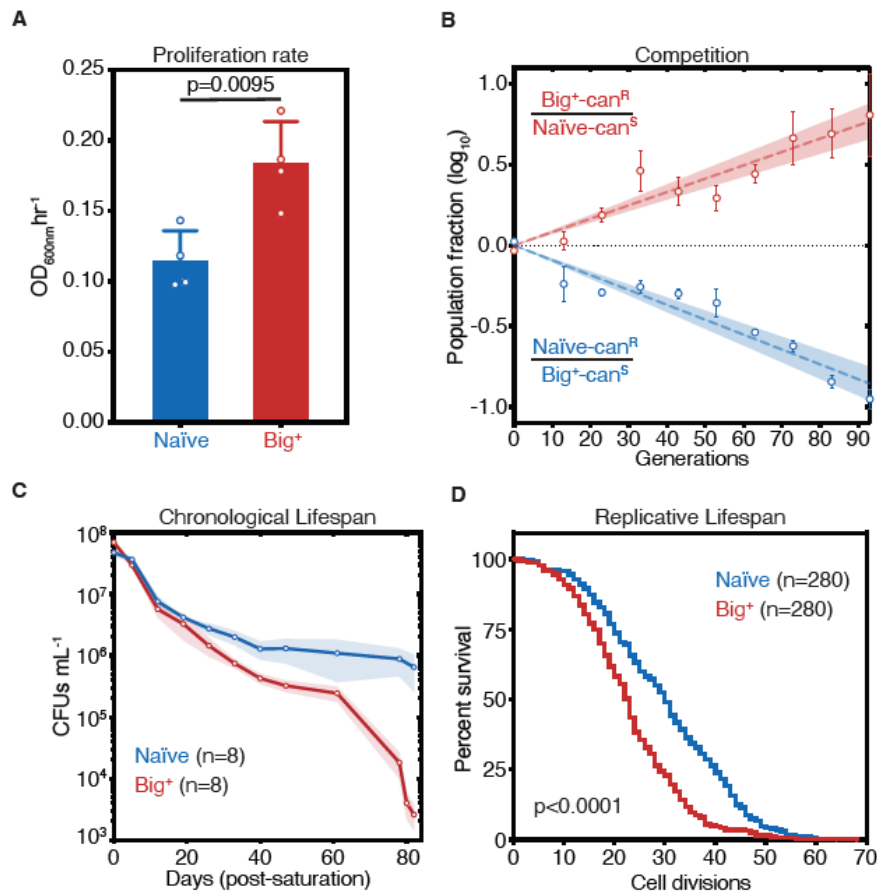

98 **Figure 1. Cells bearing a prion-like epigenetic element live fast and die young.**

99 (A) Big<sup>+</sup> cells proliferate faster than naïve cells. Bars represent mean of four replicates of maximum  
100 growth rate in YPD medium (measured by the peak of the derivative of the growth data), error bars are  
101 standard deviation,  $p=0.0095$ , unpaired t-test. (B) In a direct growth competition, Big<sup>+</sup> cells outcompete  
102 naïve cells. Raw data with standard error bars; trend line is dashed line showing shaded standard error;  
103 four replicates were performed for each competition. (C) Big<sup>+</sup> cells have a reduced chronological lifespan  
104 (CLS). Cells were grown to saturation in rich medium, and then transferred to nutrient poor medium and  
105 allowed to age for up to 80 days. Periodically samples were re-plated onto rich medium to measure  
106 remaining viability via colony forming units (CFUs). Thin lines are the average value from eight biological  
107 replicates with standard error represented by shading. (D) Big<sup>+</sup> cells have a reduced replicative lifespan  
108 (RLS). Starting with virgin mother cells, at each cell division daughter cells were separated and the total  
109 number yielded was counted for each replicate.  $n=280$  per strain, combined from three independent  
110 experiments. P value < 0.0001, by Gehan-Breslow-Wilcoxon Test. Median survival: naïve=30  
111 generations, Big<sup>+</sup>=23 generations.

112 We next tested whether this growth advantage from the Big<sup>+</sup> epigenetic element  
113 would be more pronounced during direct competition and oscillating nutrient  
114 availability—as a single-celled organism such as yeast often face in nature. To do so,  
115 we performed a competition experiment that encompassed periods of abundant nutrient  
116 availability followed by starvation. Using resistance to canavanine as a marker for naïve  
117 and Big<sup>+</sup> strains, we mixed equal numbers of cells from each strain and propagated the  
118 mixed culture for close to 100 generations, diluting into fresh medium and measuring  
119 the fraction of the population that harbored the canavanine resistance marker every ~10  
120 generations (**Supplementary Fig. 1A**). In these experiments, cells harboring Big<sup>+</sup>  
121 invariably outcompeted the genetically identical naïve cells that lacked it—they *live*  
122 *fast*—with a selection coefficient of nearly 1% (**Fig. 1B**). Competitions using reciprocally  
123 marked strains produced equivalent results. As a frame of reference, the fitness  
124 advantages that we measured for Big<sup>+</sup> are larger than those conferred by >30% of non-  
125 essential genes (Breslow et al., 2008) and the vast majority of natural genetic variants  
126 that have been quantified (Jakobson and Jarosz, 2019; Jakobson et al., 2019; Sharon  
127 et al., 2018; She and Jarosz, 2018).

128 Given the close link between proliferation and aging in many organisms (Bitto et  
129 al., 2015), we investigated whether Big<sup>+</sup> also influenced lifespan. Studies of aging in  
130 budding yeast have led to the discovery of numerous genes with conserved roles in  
131 aging of metazoans (Kaeberlein, 2010). These studies have measured two types of  
132 aging, both of which we tested here—chronological lifespan and replicative lifespan  
133 (Longo et al., 2012). Chronological lifespan is a measure of post-mitotic viability, during

134 which cells cease division under starvation conditions, until nutrients become available  
135 again. These conditions occur commonly in the natural ecology of this organism (Landry  
136 et al., 2006). To investigate, we aged cultures of naïve cells and genetically identical  
137 cells harboring Big<sup>+</sup> (**Supplementary Fig. 1B**). Over the course of 80 days, Big<sup>+</sup> cells  
138 had progressively lower viability than matched, isogenic, naïve controls (**Fig. 1C**).

139 Replicative lifespan is a measurement of the number of cell divisions that yeast  
140 can undergo before death (**Supplementary Fig. 1B**). These experiments revealed a  
141 significant difference in replicative potential between Big<sup>+</sup> and naïve cells—the median  
142 survival rate is reduced by seven generations (**Fig. 1D**,  $p < 0.0001$ , Gehan-Breslow-  
143 Wilcoxon Test, and **Supplementary Fig. 1C**). This degree of lifespan shortening falls  
144 into the range seen for classic lifespan mutants: yeast lacking *SIR3* or *SIR4* have  
145 reductions of ~3–4 generations, and yeast lacking *SIR2* by ~10–11 generations  
146 (Kaeberlein et al., 2005; Kaeberlein et al., 1999). Thus, Big<sup>+</sup> cells harboring this Pus4-  
147 induced element exhibit both a significantly decreased chronological lifespan and  
148 replicative lifespan: they *die young*.

149

## 150 **Modeling tradeoffs between proliferation and lifespan**

151 We next investigated the adaptive value of the Big<sup>+</sup> phenotype by quantitatively  
152 modeling its fitness consequences in fluctuating environments, where committing to a  
153 single strategy can impose limits on the long-term fitness of a population. For example,  
154 when nutrient-rich periods tend to greatly exceed starvation periods, the rapid growth of  
155 the Big<sup>+</sup> phenotype might be favored, in spite of its die-young phenotype (**Fig. 2A**). But



156 this same decision could be maladaptive if growth conditions skewed towards frequent  
 157 and longer periods of nutrient scarcity—where cells that grow slower and die older  
 158 would instead have an advantage (**Fig. 2B**).

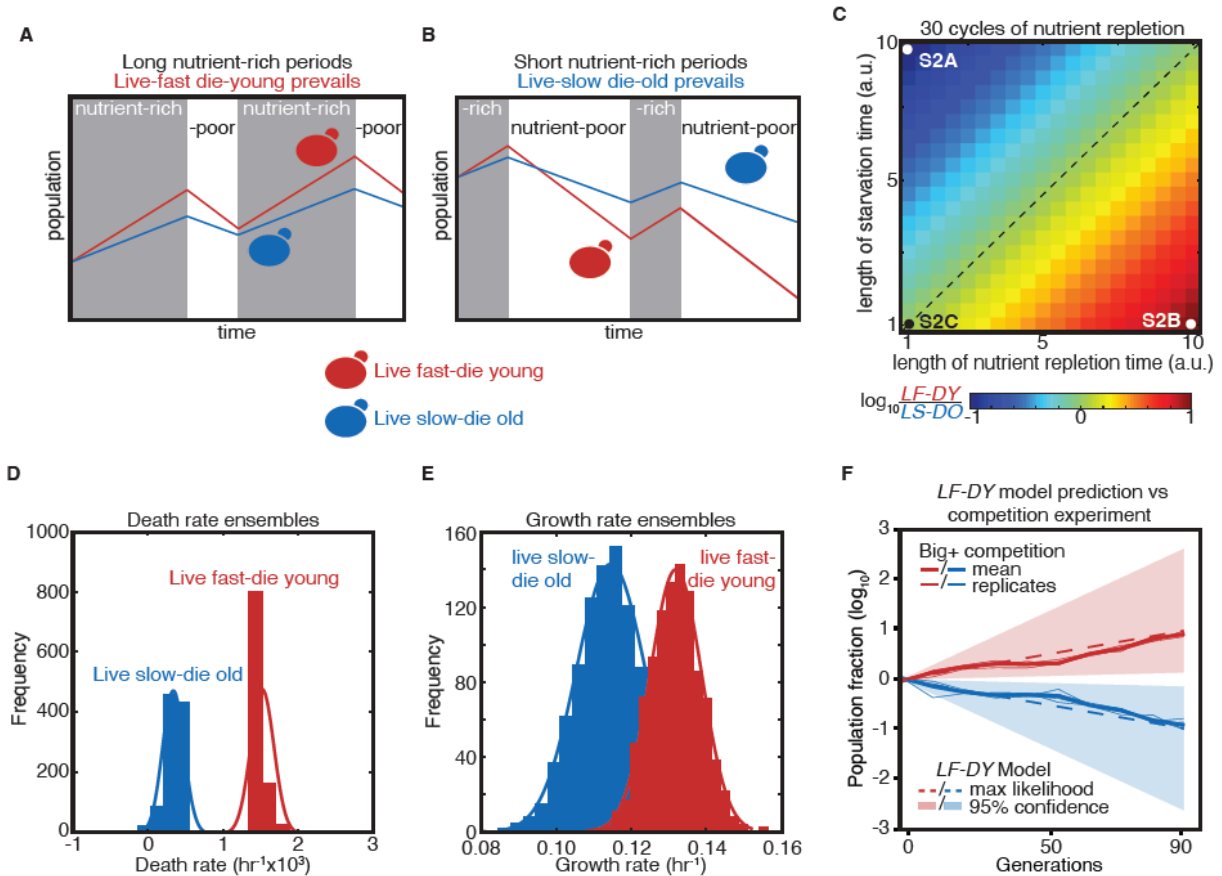

159  
 160 **Figure 2. Modeling a reversible epigenetic live fast and die young strategy.**  
 161 (A) A live fast–die young epigenetic element is beneficial for survival in environments with regular,  
 162 extended nutrient-rich periods. (B) A live slow–die old growth state is beneficial for survival during  
 163 conditions of repeated and extended starvation. (C) Simulated final population fraction (ratio of *LF-DY* to  
 164 *LS-DO*) after 30 cycles of nutrient repletion and starvation, assuming a 1% growth advantage, a 1%  
 165 higher death rate, and equal starting population sizes. Note log scale. (D) Monte Carlo sampling of  
 166 exponential decay constant and (E) exponential growth constant distributions used to generate the  
 167 ensemble of simulations shown in, (F) Monte Carlo simulation (dashed lines) of growth competition  
 168 between *LF-DY* to *LS-DO* cells under parameters sampled from experimental growth and lifespan  
 169 measurements of the Big<sup>+</sup> element (**Fig. 2D–E**). 95% confidence interval indicated by shaded areas.  
 170 Shown in solid lines are the results of competitive growth between Big<sup>+</sup> and naïve cells as shown in **Fig.**  
 171 **1B** (mean: bold line; n = 4 biological replicates: thin lines).

173 To quantify these tradeoffs, we considered a population in which individuals  
 174 heritably adopted one of these two strategies (live-fast-die-young, *LF-DY*, like Big<sup>+</sup> cells;

175 or live-slow-die-old, *LS-DO*, like naïve cells), modeling their fates in alternating nutrient  
176 environments (**Fig. 2C**). These simulations suggested that *LS-DO* cells should  
177 outcompete *LF-DY* cells when the periods of starvation are much longer than periods of  
178 nutrient abundance (**Supplementary Fig. 2A**). By contrast, *LF-DY* cells come to  
179 dominate the simulated culture when periods of nutrient abundance are much longer  
180 than periods of starvation (**Supplementary Fig. 2B**). When periods of starvation and  
181 nutrient repletion are of equal duration, both populations are equally fit (**Supplementary**  
182 **Fig. 2C**). When we varied the growth advantage and lifespan cost of the *LF-DY* sub-  
183 population, and also the periods of nutrient availability and starvation, we noted that  
184 each phase space contained regimes in which *either* strategy could be advantageous  
185 (**Fig. 2C** and **Supplementary Fig. 2D**).

186 Regimes in which either the *LF-DY* or *LS-DO* strategies would be strongly  
187 adaptive (and the other maladaptive) arose frequently under physiologically relevant  
188 environmental parameters. Oscillations within these regimes (i.e. between feast and  
189 famine) are common in nature (Broach, 2012), and withstanding them is essential for  
190 survival. Theory predicts that reversible epigenetic mechanisms, such as prions, could  
191 confer a selective advantage in fluctuating environments (King and Masel, 2007).  
192 Importantly, our model demonstrates that this advantage could derive not only from a  
193 tradeoff between improved stress resistance and impaired growth in normal conditions,  
194 but also from a growth advantage in times of plenty coupled with a disadvantage under  
195 stress.

196 Notably, the growth advantages we observed in our competition experiment were  
197 quantitatively consistent with Monte Carlo simulations sampled from our experimental  
198 measurements of the death rates (from chronological lifespan measurements, **Fig. 2D**)  
199 and growth rates (from proliferation rate measurements, **Fig. 2E**) of individual cultures  
200 in nutrient starved and replete conditions, respectively (**Supplementary Fig. 2E**). That  
201 is, the adaptive advantages that we measured in competition were equivalent to those  
202 that we predicted for a hypothetical *LF-DY* population after dozens of generations (**Fig.**  
203 **2F**). Thus, selection on these properties could be alone sufficient to favor maintenance  
204 of the Big<sup>+</sup> state under the conditions we examined.

205

### 206 **Big<sup>+</sup> cells are large**

207 Positive correlations between growth rate and cell size have long been noted (Johnston  
208 et al., 1977; Schaechter et al., 1958; Su and O'Farrell, 1998; Turner et al., 2012). To  
209 determine if the faster-growing Big<sup>+</sup> cells were also larger, we examined them  
210 microscopically, employing a widely-used image masking pipeline (Carpenter et al.,  
211 2006). This allowed us to measure the sizes of thousands of cells from multiple  
212 biological replicates, defining size distributions for both naïve and Big<sup>+</sup> populations.

213 During exponential growth, populations of Big<sup>+</sup> cells had a similar size distribution  
214 to populations of naïve control cells. However, as the cultures became denser, naïve  
215 control cells remained the same size whereas isogenic haploid Big<sup>+</sup> cells became larger  
216 (**Fig. 3A** and **Supplementary Fig. 3**). To simplify these comparisons, we scored  
217 distributions by the fraction of very large cells that we observed (one standard deviation

218 or larger than the mean naïve size; **Fig. 3B**, n=4,678 and 5,501 cells shown for naïve  
219 and Big<sup>+</sup>, respectively). This increase in mean area from 22.01  $\mu\text{m}^2$  to 25.36  $\mu\text{m}^2$   
220 corresponds to a 23% larger volume (approximating the yeast cell as a sphere, naïve  
221 cell mean radius = 2.65  $\mu\text{m}$ , Big<sup>+</sup> cell mean radius = 2.84  $\mu\text{m}$ ). In Big<sup>+</sup> cultures 33.1  $\pm$   
222 (2.8)% of cells exceeded this threshold, whereas 16.5  $\pm$ (1.8)% did in naïve cultures  
223 (p=0.0011 by unpaired t-test; **Fig. 3C**).

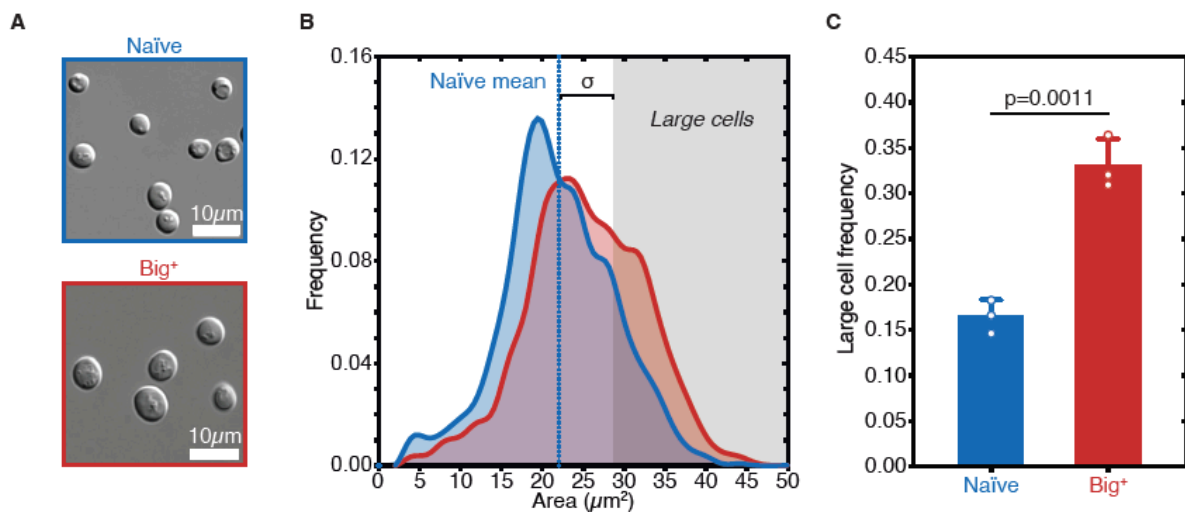

224  
225 **Figure 3. Big<sup>+</sup> cells are large.**

226 (A) Micrographs of naïve and Big<sup>+</sup> haploid yeast cells. (B) Cell size distributions for thousands of naïve  
227 and Big<sup>+</sup> haploid cells (100% of distribution is shown, n=4,678 for naïve, n=5,501 for Big<sup>+</sup>, dotted lines  
228 indicate mean). Large cell threshold begins at one standard deviation above the naïve mean. (C) The  
229 frequency of haploid cells above the large cell threshold. Bars represent mean of three replicate strains,  
230 for which thousands of cells are measured for each strain, error bars are standard deviation. p=0.0011,  
231 unpaired t-test.

### 232 [BIG<sup>+</sup>] is a prion transmitted through mating and meiosis

234 Big<sup>+</sup> was originally induced by transient *PUS4* overexpression in a screen to identify  
235 prion-like epigenetic elements (Chakrabortee et al., 2016a). We therefore tested  
236 whether the increased cell size associated with this state was transmitted through  
237 genetic crosses with the unusual patterns of inheritance that characterize prion-based  
238 phenotypes (Brown and Lindquist, 2009; Cox, 1965; Wickner, 1994). We began by

239 mating the large haploid Big<sup>+</sup> cells to naïve haploids of the opposite mating type,  
240 selecting diploid cells, and measuring their size. The resulting diploids were significantly  
241 larger than those derived from control crosses with two naïve parents (**Fig. 4A–B**),  
242 establishing that the trait is dominant.

243         We next investigated the meiotic inheritance of the large cell size trait. Because  
244 they are not driven by changes in nucleic acid sequence, prions have unusual patterns  
245 of inheritance that defy Mendel’s laws. In addition to dominance in genetic crosses,  
246 prion-based traits can be passed to *all* progeny of meiosis, in contrast to DNA-based  
247 traits, which are inherited by half (**Supplementary Fig. 4A**)(Garcia and Jarosz, 2014; Li  
248 and Kowal, 2012; Liebman and Chernoff, 2012; Wickner, 2016). We first mated control  
249 naïve cells to naïve cells of the opposite mating type, sporulated the resulting diploids,  
250 and dissected their meiotic progeny. We then grew clonal cultures of these haploid  
251 meiotic progeny and examined their size distributions, which were indistinguishable  
252 from their haploid naïve parents (**Fig. 4C**). In contrast, all cultures derived from the  
253 meiotic progeny of Big<sup>+</sup> × naïve crosses were large (**Fig. 4C** and **Supplementary Fig.**  
254 **4B**), a non-Mendelian pattern of inheritance that differs strongly from the expected  
255 behavior for genetic mutants or chromatin-based epigenetic elements, but is consistent  
256 with a prion-based mechanism of transmission. We therefore term this state “[BIG<sup>+</sup>]”  
257 (with capital letters indicating dominance and brackets denoting its non-Mendelian  
258 pattern of segregation).

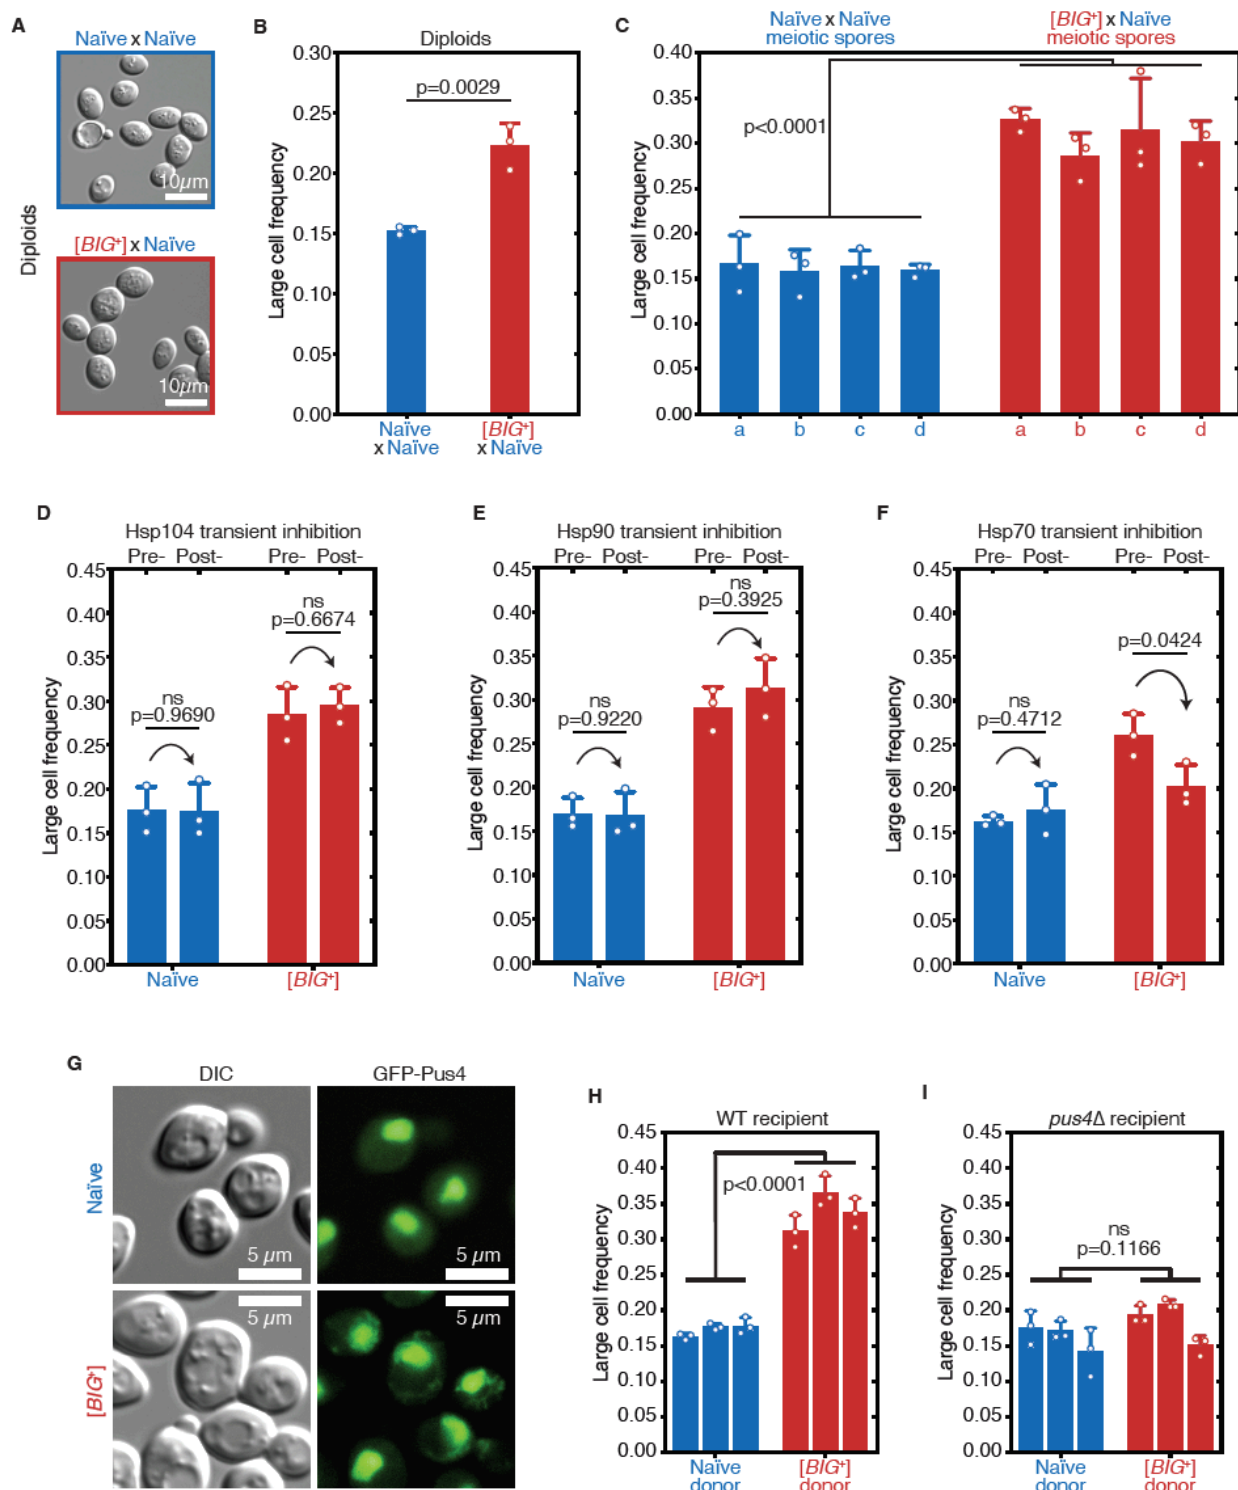

259

260 **Figure 4. [BIG<sup>+</sup>] has prion-like patterns of inheritance.**

261 (A) Micrographs of diploid yeast cells resulting from crosses of naïve and naïve parents, or naïve and  
 262 [BIG<sup>+</sup>] parents. (B) The frequency of diploid cells above the large cell threshold. Bars represent mean of  
 263 three replicate strains, for which thousands of cells are measured for each strain, error bars are standard  
 264 deviation.  $p=0.0029$ , unpaired t-test. (C) Inheritance of large cell frequency to all meiotic spores. Bars  
 265 represent the mean frequency of cells above the large cell threshold from three replicates, for which

266 thousands of cells were measured for each replicate, error bars are standard deviation. Difference  
267 between the means of four tetrad spores between naïve and  $[BIG^+]$ ,  $p < 0.0001$ , unpaired t-test. **(D)**  
268 Transient inhibition of Hsp104 chaperone activity using guanidinium hydrochloride (GdnHCl) does not  
269 heritably alter the cell size trait. Bars represent the mean frequency of cells above the large cell threshold  
270 from three replicates, for which thousands of cells were measured for each replicate, error bars are  
271 standard deviation. Control samples (left bars of each pair) were propagated in parallel on nutrient-  
272 matched agar plates not containing GdnHCl. Post-inhibition represents strains subjected to GdnHCl  
273 treatment followed by recovery prior to cell size measurements (**Materials and Methods**). Naïve  
274  $p = 0.9690$ ,  $[BIG^+]$   $p = 0.6674$ ; unpaired t-test for both. **(E)** Transient inhibition of Hsp90 chaperone  
275 activity using Radicicol does not heritably alter the cell size trait. Bars represent the mean frequency of cells  
276 above the large cell threshold from three replicates, for which thousands of cells were measured for each  
277 replicate, error bars are standard deviation. Control samples (left bars of each pair) were propagated in  
278 parallel on nutrient-matched agar plates not containing Radicicol. Post-inhibition represents strains  
279 subjected to Radicicol treatment followed by recovery prior to cell size measurements (**Materials and**  
280 **Methods**). Naïve  $p = 0.9220$ ,  $[BIG^+]$   $p = 0.3925$ ; unpaired t-test for both. **(F)** Transient inhibition of Hsp70  
281 chaperone activity by expression of a dominant negative allele of *SSA1* permanently eliminates the  $[BIG^+]$   
282 cell size trait. Bars represent the mean frequency of cells above the large cell threshold from three  
283 replicates, for which thousands of cells were measured for each replicate, error bars are standard  
284 deviation. Control samples (left bars of each pair) did not contain the *SSA1*<sup>K69M</sup> constitutive expression  
285 plasmid but were propagated in parallel on non-dropout but otherwise nutrient-matched agar plates. Post-  
286 inhibition represents strains subjected to plasmid expression followed by plasmid removal and recovery  
287 prior to cell size measurements (**Materials and Methods**). Naïve  $p = 0.4712$ ,  $[BIG^+]$   $p = 0.0424$ ; unpaired t-  
288 test for both. **(G)** The expression pattern of Pus4 is altered in  $[BIG^+]$  cells. **(H)**  $[BIG^+]$  can be transmitted  
289 via cytoduction into a wild-type recipient cell, consistent with a prion-based mechanism. Each bar  
290 represents the mean frequency of cells above the large cell threshold from three biological replicates, for  
291 which thousands of cells were measured for each replicate, error bars are standard deviation. Bars for  
292 three independent cytoductants are shown for each donor strain. Difference between the means of the  
293 three cytoductants between naïve and  $[BIG^+]$  donors:  $p < 0.0001$ , unpaired t-test. **(I)**  $[BIG^+]$  is not  
294 transmitted via cytoduction into a *pus4* $\Delta$  recipient cell, indicating that prion transmission depends on  
295 continuous endogenous expression of Pus4. Each bar represents the mean frequency of cells above the  
296 large cell threshold from three biological replicates, for which thousands of cells were measured for each  
297 replicate, error bars are standard deviation. Bars for three independent cytoductants are shown for each  
298 donor strain. Difference between the means of the three cytoductants between naïve and  $[BIG^+]$  donors:  
299  $p = 0.1166$ , unpaired t-test.

300

### 301 **$[BIG^+]$ propagation requires the Hsp70 chaperone**

302 The inheritance of prion-based phenotypes, in contrast to those driven by genetic  
303 mutations, is strongly dependent upon the protein homeostasis network (Garcia and  
304 Jarosz, 2014; Harvey et al., 2018; Liebman and Chernoff, 2012; Shorter and Lindquist,  
305 2005). As a consequence, *transient* inhibition of molecular chaperones can lead to  
306 *permanent* elimination of prion-based traits. We therefore examined whether the large  
307 size of  $[BIG^+]$  cells also depended on protein chaperone activity (**Supplementary Fig.**  
308 **4C**). Transient inhibition of the Hsp104 disaggregase, which regulates the inheritance of

309 many amyloid prions (Chernoff et al., 1995; Eaglestone et al., 2000; Halfmann et al.,  
310 2012; Shorter and Lindquist, 2004), had no effect on cell size in either naïve or [*BIG*<sup>+</sup>]  
311 cells (**Fig. 4D**). Transient inhibition of the Hsp90 foldase, which regulates the  
312 transmission of a different subset of prions (Chakrabortee et al., 2016a), also had no  
313 impact on [*BIG*<sup>+</sup>] transmission (**Fig. 4E**). By contrast, transient inhibition of Hsp70, via  
314 expression of a dominant negative *SSA1*<sup>K69M</sup> allele (Chakrabortee et al., 2016a; Jarosz  
315 et al., 2014; Lagaudriere-Gesbert et al., 2002), caused [*BIG*<sup>+</sup>] cells to permanently lose  
316 their large size phenotype (**Fig. 4F**). Thus like other prions (Brown and Lindquist, 2009;  
317 Chakrabortee et al., 2016a; Chakravarty et al., 2019), and unlike genetic mutations,  
318 propagation of [*BIG*<sup>+</sup>] is dependent on the activity of this ubiquitous molecular  
319 chaperone.

320 We note that Hsp70 expression drops dramatically as yeast reach saturation and  
321 begin to starve (Werner-Washburne et al., 1989; Werner-Washburne and Craig, 1989),  
322 and also decreases as cells age (Janssens et al., 2015). These are two scenarios in  
323 which [*BIG*<sup>+</sup>] is disadvantageous. Therefore, environmental conditions that favor growth,  
324 during which Hsp70 is abundant, also favor prion propagation. By contrast, conditions  
325 known to reduce Hsp70 expression and thereby increase prion elimination are also  
326 those in which prion loss would be favored.

327

### 328 **Pus4 protein has a different expression pattern in [*BIG*<sup>+</sup>] cells**

329 Acquisition of [*PRION*<sup>+</sup>] states often impacts the localization of the proteins that encode  
330 them. To visualize Pus4 expression in naïve and [*BIG*<sup>+</sup>] cells, we employed a strain in



331 which an N-terminal GFP tag was appended at the endogenous *PUS4* locus (Weill et  
332 al., 2018; Yofe et al., 2016). We did not observe large fluorescent foci typical of  
333 canonical amyloid prions (Alberti et al., 2009). We did, however, observe altered  
334 localization of Pus4. In naïve cells Pus4 consistently localized to the nucleolus, as has  
335 been previously reported (Huh et al., 2003). In [*BIG*<sup>+</sup>] cells the protein was also present  
336 in the nucleolus. However, we also observed substantial fluorescence in a fragmented  
337 network throughout the cytoplasm (**Fig. 4G**), establishing that the distribution of Pus4  
338 protein is altered in [*BIG*<sup>+</sup>] cells. Although a high-resolution structure awaits  
339 determination, our data are consistent with an altered physical state of Pus4 in [*BIG*<sup>+</sup>]  
340 cells.

341

#### 342 **Endogenous Pus4 is required for propagation of [*BIG*<sup>+</sup>]**

343 Although [*BIG*<sup>+</sup>] was induced by a transient increase in Pus4, and was stable after  
344 elimination of the inducing plasmid, we wanted to exclude the possibility that this prior  
345 overexpression event might have established a positive feedback loop leading to an  
346 enduring increase in Pus4 levels. We therefore constructed naïve and [*BIG*<sup>+</sup>] strains  
347 with a seamless N-terminal 3X-FLAG tag endogenously encoded at the *PUS4* locus.  
348 Using immunoblots to detect the FLAG epitope in naïve and [*BIG*<sup>+</sup>] cells, we observed  
349 equivalent Pus4 levels, indicating that the phenotypes we observed in [*BIG*<sup>+</sup>] cells were  
350 not simply due to increased expression of this tRNA-modifying enzyme  
351 (**Supplementary Fig. 4D**).

352 Prion proteins can be inherited through the cytoplasm and do not require  
353 exchange of genetic material for propagation. To test this, we performed a cytoduction,  
354 in which we mated [*BIG*<sup>+</sup>] cells to naïve recipient cells of the opposite mating type  
355 carrying the *kar1-Δ15* mutation. Upon mating, this mutation prevents nuclear fusion,  
356 permitting mixing of cytoplasm, but not nuclei, between donor and recipient cells  
357 (**Supplementary Fig. 4E, Materials and Methods**) (Vallen et al., 1992). The transfer of  
358 [*BIG*<sup>+</sup>] cytoplasm into naïve recipient cells resulted in the transfer of the [*BIG*<sup>+</sup>] cell size  
359 phenotype (**Fig. 4H**). However, this was only the case for wild-type recipients. Naïve  
360 recipients lacking *PUS4* did not acquire the [*BIG*<sup>+</sup>] cell size phenotype (**Fig. 4I**).

361 It remained formally possible that a multi-protein prion state could be maintained  
362 by other cellular factors, even if prion-based phenotypes depended on Pus4. Therefore,  
363 we tested whether transient loss of *PUS4* was sufficient to permanently eliminate [*BIG*<sup>+</sup>].  
364 We first deleted *PUS4* from [*BIG*<sup>+</sup>] and naïve cells. Upon *PUS4* deletion, the sizes of the  
365 mutants derived from naïve and [*BIG*<sup>+</sup>] parents were equivalent (**Supplementary Fig.**  
366 **4F**). Together with our cytoduction data, this suggested that continuous production of  
367 Pus4 is required to maintain this trait. Furthermore, *PUS4* deletion did not increase the  
368 size of naïve cells, suggesting that [*BIG*<sup>+</sup>] does not inactivate Pus4, in contrast to many  
369 well characterized prions that phenocopy loss-of-function alleles of their underlying  
370 proteins (Byers and Jarosz, 2014). Finally, we restored the *PUS4* gene to its native  
371 locus in these same cells by homology-directed integration. Even after re-introduction of  
372 *PUS4*, the size distributions of both populations remained equivalent (**Supplementary**

373 **Fig. 4F)**. Thus, both the expression and the propagation of the [*BIG*<sup>+</sup>] phenotype require  
374 the continual presence of a *PUS4* gene product.

375 These various lines of evidence—transmission to all meiotic progeny,  
376 dependence on molecular chaperones, altered expression pattern, and requirement for  
377 continuous expression of the protein that initiated the epigenetic trait—lead us to  
378 propose that [*BIG*<sup>+</sup>] is a protein-based element of inheritance, a prion, formed by the  
379 Pus4 pseudouridine synthase.

380

### 381 **Pseudouridylation is maintained in [*BIG*<sup>+</sup>] cells**

382 Because loss of *PUS4* did not phenocopy [*BIG*<sup>+</sup>], but did block propagation of the prion,  
383 we wondered whether the catalytic activity of Pus4 was maintained in [*BIG*<sup>+</sup>] cells. To  
384 measure pseudouridylation in naïve and [*BIG*<sup>+</sup>] cells, we employed a qPCR-based  
385 method that capitalizes on the enhanced susceptibility of pseudouridine to reacting with  
386 CMC (1-cyclohexyl-(2-morpholinoethyl)carbodiimide metho-p-toluene sulfonate; **Fig.**  
387 **5A)**(Lei and Yi, 2017). When pseudouridines are “labeled” by CMC, and these RNAs  
388 are used as templates for replication by reverse transcriptase, the enzyme generates  
389 nucleotide deletions and other mutations at these sites that can be detected by  
390 differences in the melting temperature of the derived nucleic acid duplexes, compared  
391 to non-pseudouridylated or unlabeled controls. Using this approach, we examined  
392 pseudouridylation of an archetypical Pus4 substrate, tRNA<sub>AGC</sub> (Ala). When a  
393 pseudouridine is present and CMC is added, the melting curve shifts relative to an  
394 unlabeled control (no CMC). We observed a similar leftward shift in melting curves for

395 both naïve and  $[BIG^+]$  cells. In contrast, negative control cells missing the Pus4 protein,  
 396 and therefore not pseudouridylated at U55, did not produce this shift (**Fig. 5B**). These  
 397 data establish that Pus4-dependent modification of tRNAs is maintained in  $[BIG^+]$  cells.

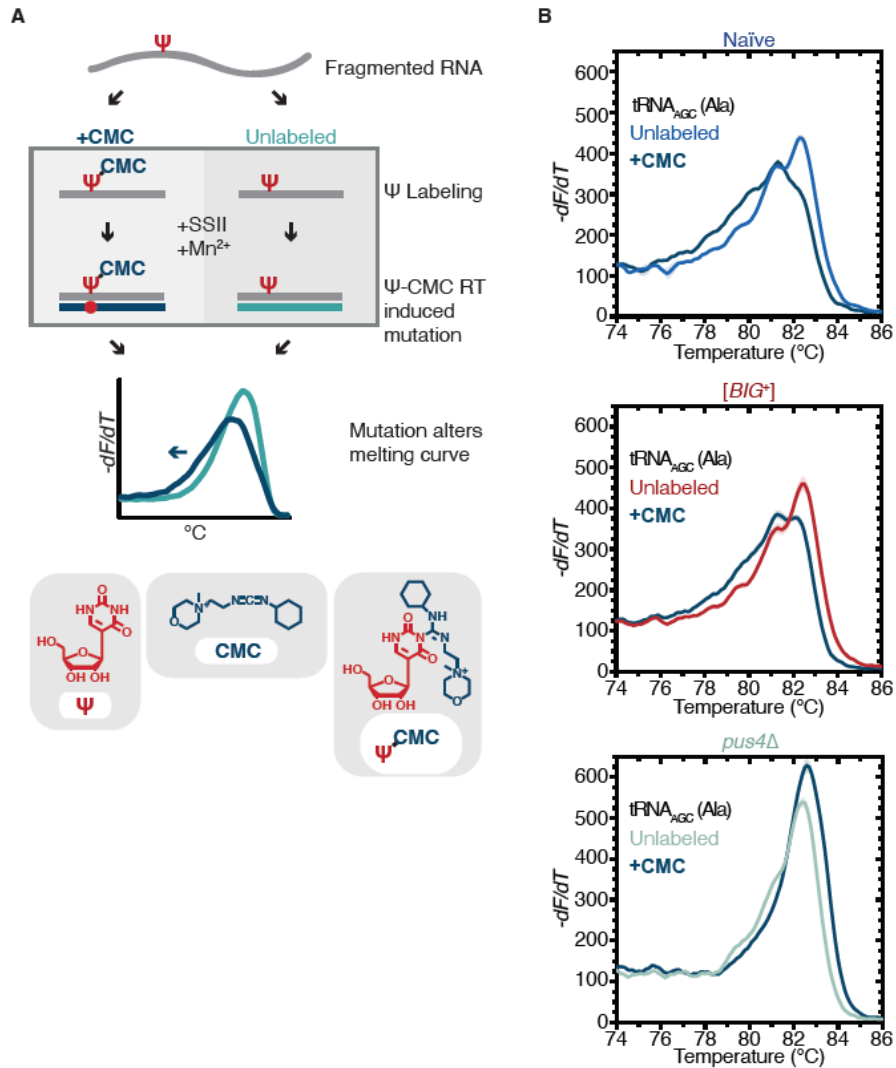

398 **Figure 5. Pus4 activity is maintained in  $[BIG^+]$ .**

399 (A) Radiolabeling-free, qPCR-based method for locus-specific pseudouridine detection. Figure adapted  
 400 from reference (Lei and Yi, 2017). (B) High resolution melting curve analysis demonstrates that Pus4-  
 401 dependent pseudouridylation of tRNA<sub>AGC</sub> (Ala) is maintained in  $[BIG^+]$  cells but not in cells that do not  
 402 contain Pus4p. Top panel: naïve samples CMC-labeled (black) or unlabeled (blue). Middle panel:  $[BIG^+]$   
 403 samples CMC-labeled (black) or unlabeled (red). Bottom panel: *pus4Δ* samples CMC-labeled (black) or  
 404 unlabeled (torquoise). Solid lines representing melting curves are the mean of four replicates, with  
 405 shaded areas representing standard error of the mean. The leftward shift of +CMC curves in naïve and  
 406  $[BIG^+]$  but not *pus4Δ* samples indicate Pus4-dependent pseudouridylation of U55.

407

## 408 **Relative RNA levels are nearly unchanged in [*BIG*<sup>+</sup>] cells**

409 In addition to its ubiquitous pseudouridylation activity on all tRNAs, Pus4 also modifies  
410 some mRNAs (Carlile et al., 2014; Lovejoy et al., 2014; Schwartz et al., 2014). Some  
411 have posited that pseudouridylation impacts mRNA stability (Zhao et al., 2017). To  
412 discern whether the phenotypes of [*BIG*<sup>+</sup>] cells might be due to relative changes in RNA  
413 levels, we performed RNA-sequencing. We grew naïve and [*BIG*<sup>+</sup>] cultures in YPD  
414 medium until late exponential phase, extracted total RNA, and depleted it of rRNA.  
415 Comparing five replicates each of naïve and [*BIG*<sup>+</sup>], the expression levels of only 15  
416 genes changed significantly (thirteen decreased in expression and two increased,  
417 adjusted p-values < 0.1, Wald test, multiple testing correction with Benjamini Hochberg  
418 method), and these changes were modest (**Supplementary Table 2**). From this short  
419 list we did not observe any enrichments in gene ontology categories or pathway  
420 enrichments (YeastMine, *Saccharomyces* Genome Database (Cherry et al., 2012)). We  
421 conclude that the major effects of [*BIG*<sup>+</sup>] during exponential growth (e.g. growth rate and  
422 replicative lifespan) do not occur via major changes to steady state mRNA levels.

423 To investigate whether the relative abundance of tRNAs is perturbed in [*BIG*<sup>+</sup>]  
424 cells, we ran total RNA from naïve and [*BIG*<sup>+</sup>] cells (grown to late-exponential phase) on  
425 a nucleic acid fragment analyzer, and quantified tRNA levels relative to a similarly  
426 abundant RNA that is not a target of Pus4, 5.8S rRNA (158nt)(**Supplementary Fig. 5**).  
427 We observed no significant differences. While we cannot exclude other effects on tRNA  
428 function or the relative abundance of particular tRNAs, our data show that bulk tRNA

429 abundance differences are likely also not responsible for the phenotypes of actively  
430 growing cells containing [*BIG*<sup>+</sup>].

431

### 432 [*BIG*<sup>+</sup>] cells are resistant to inhibition of protein synthesis

433 Because the increased cell size and proliferation, and reduced lifespan of [*BIG*<sup>+</sup>] cells  
434 occur in the absence of major alterations to relative abundances of mRNA or tRNA, we  
435 wondered whether a change in protein synthesis might be responsible. To test this, we  
436 employed two inhibitors: 1) cycloheximide, an inhibitor of translational elongation (Baliga  
437 et al., 1969; McKeehan and Hardesty, 1969), and 2) rapamycin, a natural product  
438 macrolide that inhibits the TOR kinase, blocking a conserved signaling cascade that  
439 promotes protein synthesis (Beretta et al., 1996; Chung et al., 1992; Kuo et al., 1992;  
440 Price et al., 1992; Urban et al., 2007).

441 [*BIG*<sup>+</sup>] cells grew nearly two-fold better than naïve cells in a sub-inhibitory  
442 concentration of cyclohexamide that was sufficient to impair proliferation (0.05  $\mu\text{g}/\text{mL}$ ;  
443 100  $\mu\text{g}/\text{mL}$  is used in experiments that rapidly and completely arrest translation) (**Fig.**  
444 **6A**; compare to growth rates in **Fig. 1A**). [*BIG*<sup>+</sup>] cells also proliferated faster in a  
445 concentration of rapamycin that inhibited growth (**Fig. 6B**), suggesting that the pathway  
446 may be more active in cells harboring the prion. This latter observation also provides a  
447 potential explanation for the decreased longevity of [*BIG*<sup>+</sup>] cells: loss of TOR pathway  
448 function is associated with extended lifespan in yeast (Dikicioglu et al., 2018; Fabrizio et  
449 al., 2001; Powers et al., 2006) and many other organisms including nematodes, fruit  
450 flies, and mice (Bjedov et al., 2010; Harrison et al., 2009; Robida-Stubbs et al., 2012).

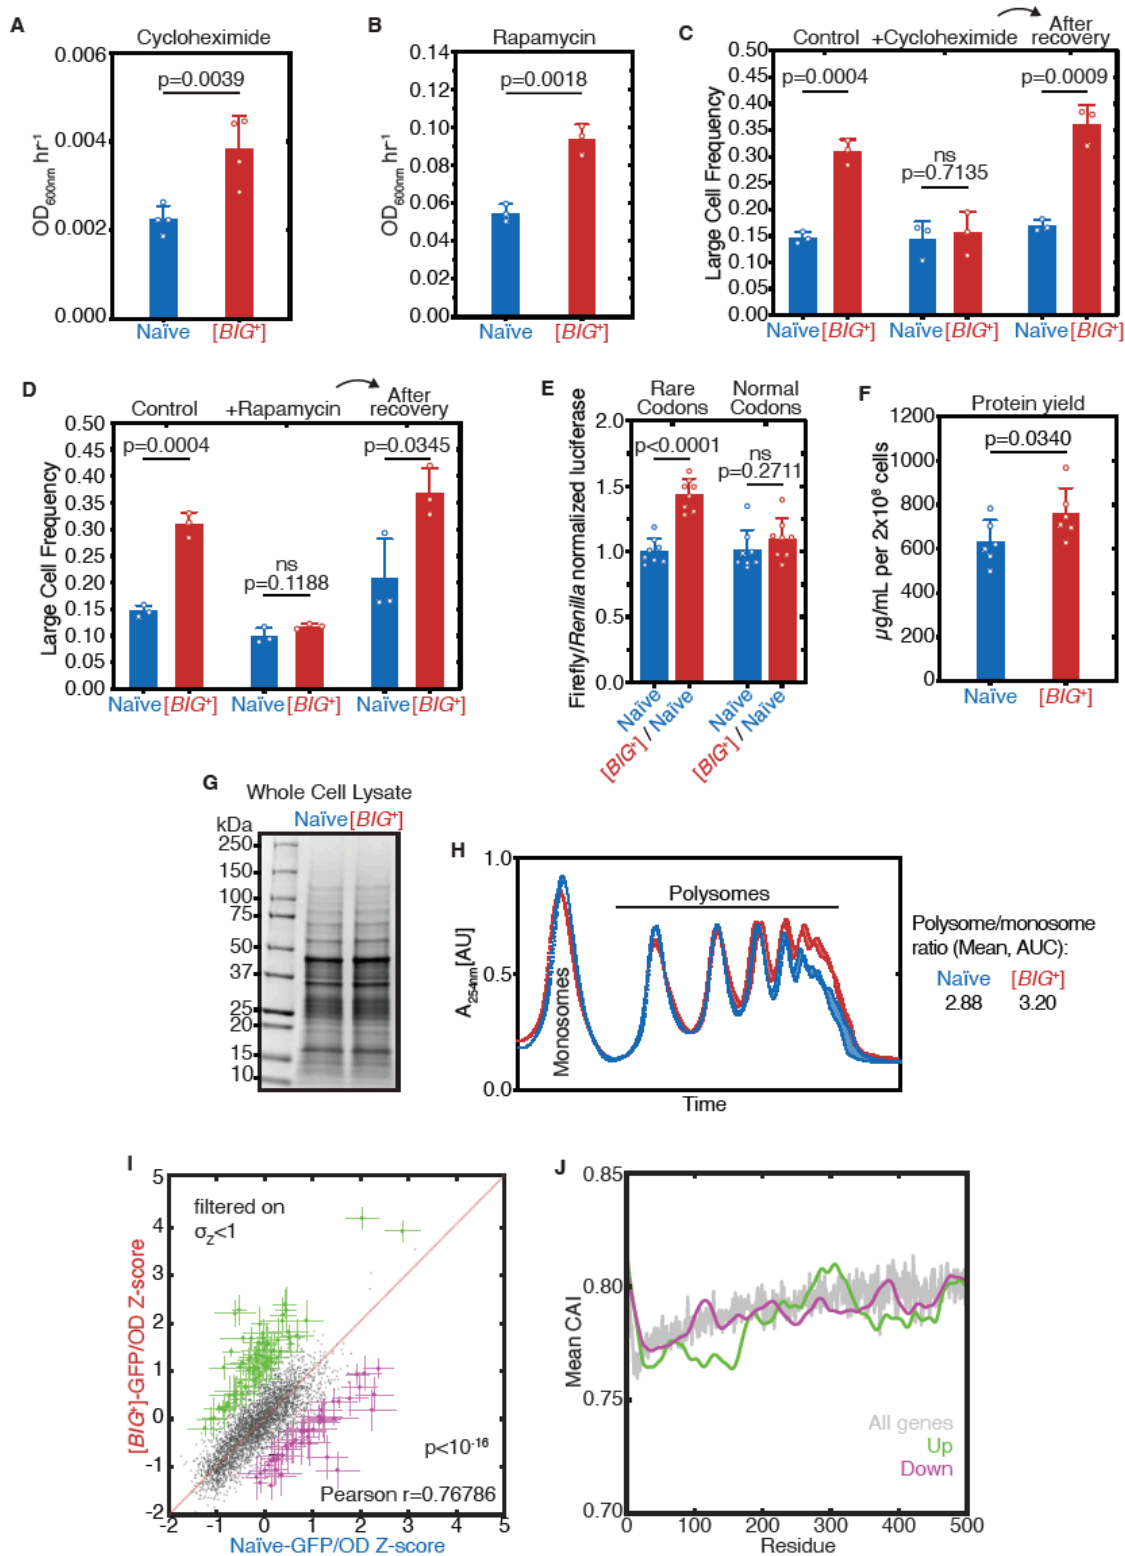

451 **Figure 6. [BIG<sup>+</sup>] has altered protein synthesis.**

452 (A) [BIG<sup>+</sup>] cells are resistant to translation elongation inhibitor cycloheximide. Bars represent the mean of  
 453 the maximum growth rate in YPD+cycloheximide (measured by the peak of the derivative of the growth  
 454 data) of four replicates, error bars are standard deviation, p=0.0039, unpaired t-test. (B) [BIG<sup>+</sup>] cells are  
 455 resistant to TOR inhibitor rapamycin. Bars represent the mean of the maximum growth rate in

456 YPD+rapamycin (measured by the peak of the derivative of the growth data) of three replicates, error  
457 bars are standard deviation,  $p=0.0018$ , unpaired t-test. (C)  $[BIG^+]$  cells grown in cycloheximide are not  
458 larger than naïve cells. However after recovery they regain this phenotype. After treatment, cells were  
459 subcultured in YPD for  $\sim 75$  generations before re-measuring the size in the absence of stress (see  
460 **Materials and Methods**). Bars represent the mean frequency of cells above the large cell threshold from  
461 three replicates, for which thousands of cells were measured for each replicate, error bars are standard  
462 deviation. Difference between the means of naïve and  $[BIG^+]$ : YPD control  $p=0.0004$ ; YPD+cycloheximide  
463  $p=0.7135$ ; YPD after recovery  $p=0.0009$ ; unpaired t-test for all. (D)  $[BIG^+]$  cells grown in rapamycin are  
464 not larger than naïve cells. However after recovery they regain this phenotype. After treatment, cells were  
465 subcultured in YPD for  $\sim 75$  generations before re-measuring the size in the absence of stress (see  
466 **Materials and Methods**). Bars represent the mean frequency of cells above the large cell threshold from  
467 three replicates, for which thousands of cells were measured for each replicate, error bars are standard  
468 deviation. Difference between the means of naïve and  $[BIG^+]$ : YPD control  $p=0.0004$  (same data  
469 presented in **Fig. 6C** as experiments were done in parallel); YPD+rapamycin  $p=0.1188$ ; YPD after  
470 recovery  $p=0.0345$ ; unpaired t-test for all. (E)  $[BIG^+]$  meiotic progeny translate more of a Firefly luciferase  
471 reporter containing rare codons than naïve meiotic progeny do. This effect is not seen in an mRNA  
472 variant that encodes an identical protein but contains codons more frequently used in yeast. Bars  
473 represent mean normalized luciferase values (an invariable *Renilla* luciferase gene is co-expressed from  
474 the same plasmid) from eight replicates: rare codons  $p<0.0001$ , normal codons  $p=0.2711$ , unpaired t-  
475 tests for both. (F)  $[BIG^+]$  cells produce more total protein per cell number than naïve cells, as measured  
476 by Bicinchoninic Acid (BCA) Assay. Bars represent the mean of six replicates,  $p=0.0340$ , unpaired t-test.  
477 (G) Coomassie stain of  $15\mu\text{g}$  whole cell protein lysate from each strain suggests there are not major  
478 differences in the relative expression of the most abundant proteins in  $[BIG^+]$  cells compared to naïve  
479 cells. (H)  $[BIG^+]$  cells have more polysomes than naïve cells, as measured by polysome profiling. Lines  
480 for two technical replicates for each sample are shown, with the area between them shaded. Ratios  
481 (average of two technical replicates) were calculated by taking the lowest point between the monosome  
482 and disome peak as zero, and then calculating the ratios of the areas under the sum of the polysome  
483 peaks to that under the monosome peaks. (I) Plot showing proteome-wide GFP::protein fusion expression  
484 in  $[BIG^+]$  cells compared to naïve cells, highlighting  $\sim 130$  proteins whose levels change. Each dot  
485 represents the mean of quadruplicate measurements of a single protein in naïve or  $[BIG^+]$  cells: black  
486 dots are proteins that did not change significantly as measured by Z-score change of less than 1.0 ( $\sigma_z<1$ );  
487 green dots are protein fusions with higher fluorescence in  $[BIG^+]$  cells; violet dots are protein fusions with  
488 lower fluorescence in  $[BIG^+]$  cells. For colored dots, standard error of the mean is shown for both  
489 measurements from four biological replicates each. Pearson correlation of naïve and  $[BIG^+]$  cells,  
490  $r=0.76786$ , and  $p<10^{-16}$  indicates that most proteins have correlated expression levels.  $OD_{600}$  was  
491 adjusted based on known blank wells, and the GFP/ $OD_{600}$  measurements were normalized by Z-score  
492  $([x_i-\mu]/\sigma)$  within the naïve and  $[BIG^+]$  populations independently. (J) Plot showing the protein residue  
493 number vs. the mean codon adaptation index (CAI) for all measured GFP-tagged proteins (grey line) and  
494 proteins whose levels were increased (green line) or decreased (violet line) in  $[BIG^+]$  relative to naïve cells  
495 in the proteome-wide screen. Proteins whose levels were elevated in  $[BIG^+]$  relative to naïve cells have a  
496 lower mean CAI in the 5' ends of their mRNAs.

497

498 We next investigated whether these inhibitors impacted the size of  $[BIG^+]$  cells.

499 When grown in cycloheximide or rapamycin to saturation,  $[BIG^+]$  cells were no longer

500 large compared to naïve controls (**Fig. 6C–D**). Thus, unperturbed translation is

501 necessary for the increased size of  $[BIG^+]$  cells. These data could be explained by the



502 inhibitors masking expression of the large cell trait, or by reversion of the [*BIG*<sup>+</sup>] prion.  
503 To distinguish between these possibilities, we sub-cultured cells that had been treated  
504 with cycloheximide or rapamycin and allowed them to recover in rich medium for several  
505 dozen generations. We then examined their size distributions. Cell populations derived  
506 from [*BIG*<sup>+</sup>] ancestors were once again significantly larger than naïve controls that we  
507 subjected to the same propagation regime (**Fig. 6C–D**). We conclude that [*BIG*<sup>+</sup>]  
508 depends on protein synthesis to augment cell size, but that the prion is stable to  
509 transient perturbations in translation.

510

### 511 [*BIG*<sup>+</sup>] increases protein synthesis

512 Translation is rate-limiting for growth in nutrient-rich conditions (Kafri et al., 2016). We  
513 observed enhanced growth of [*BIG*<sup>+</sup>] cells in rich YPD medium (**Fig. 1A–B**). However, in  
514 synthetic defined medium with identical carbon source abundance (2% glucose), but  
515 fewer amino acids, nucleosides, and other nutrients for optimum growth (SD-CSM),  
516 [*BIG*<sup>+</sup>] cells did not grow faster than naïve controls (**Supplementary Fig. 6A**). These  
517 data, combined with the resistance of the prion cells to cycloheximide and rapamycin,  
518 suggested that protein synthesis might be enhanced in [*BIG*<sup>+</sup>] cells.

519 Because a major component of translational regulation is the efficiency with  
520 which each mRNA is translated by the ribosome, we examined the impact of [*BIG*<sup>+</sup>] on  
521 mRNAs encoded with different codons using luciferase reporter assays. We  
522 transformed [*BIG*<sup>+</sup>] cells and isogenic naïve control cells with dual-luciferase plasmids  
523 encoding both *Renilla* and firefly luciferase genes. We tested two versions of the firefly

524 luciferase gene: the first contained the normal suite of firefly mRNA codons; the second  
525 produced an identical protein product, but via codons that are more rare in *S.*  
526 *cerevisiae*, reducing steady-state protein levels by ~five-fold (Chu et al., 2014). Each  
527 plasmid also contained an internal control: the *Renilla* luciferase gene with its natural  
528 set of codons. The firefly reporter with “normal” codons did not produce more luciferase  
529 activity in [*BIG*<sup>+</sup>] cells than in naïve cells, when normalized to the *Renilla* control (**Fig.**  
530 **6E**). However, the firefly reporter with rarer codons produced normalized luciferase  
531 levels approximately 50% higher in [*BIG*<sup>+</sup>] cells than in isogenic naïve control cells (**Fig.**  
532 **6E**). These data suggest that [*BIG*<sup>+</sup>] cells may enhance translation of some proteins,  
533 especially those containing a greater frequency of rare codons. We observed these  
534 effects in both meiotic spores from naïve x [*BIG*<sup>+</sup>] crosses (**Fig. 6E**), and the original  
535 [*BIG*<sup>+</sup>] isolates (**Supplementary Fig. 6B**). Therefore the altered translation phenotype,  
536 like cell size, is inherited by all progeny of meiosis.

537 We next investigated whether [*BIG*<sup>+</sup>] had global effects on the proteome by  
538 isolating total protein from cells harboring the prion and naïve controls. We reproducibly  
539 obtained more total protein per cell from the [*BIG*<sup>+</sup>] cultures (**Fig. 6F**). We next loaded  
540 an equal mass of protein lysate from naïve and [*BIG*<sup>+</sup>] cells onto a denaturing  
541 polyacrylamide gel and separated them by electrophoresis. Coomassie staining of these  
542 gels showed no pronounced differences in banding patterns (**Fig. 6G**), suggesting that  
543 [*BIG*<sup>+</sup>] does not exert large changes on the composition of the major expressed portion  
544 of the proteome, proteins which are known to be efficiently translated (Gingold and  
545 Pilpel, 2011; Plotkin and Kudla, 2011).

546 We next performed polysome gradient analysis to assess global translation  
547 activity. We observed no change in monosomes or disomes in [*BIG*<sup>+</sup>] samples  
548 compared to naïve controls. However, polysomes—which are responsible for most  
549 protein synthesis (Noll, 2008; Warner and Knopf, 2002)—were increased in [*BIG*<sup>+</sup>] cells  
550 relative to naïve controls (**Fig. 6H**). In summary, we found that [*BIG*<sup>+</sup>] cells have higher  
551 levels of translation, which increases total protein output, and may particularly increase  
552 the levels of some proteins translated from mRNAs enriched with codons that are more  
553 rare in yeast.

554

#### 555 **[*BIG*<sup>+</sup>] reduces time spent in G1 phase of the cell cycle**

556 Conditions that enhance protein synthesis also tend to reduce the fraction of time that  
557 cells spend in the G1 stage of the cell cycle (Jorgensen and Tyers, 2004). This is due to  
558 the fact that commitment to S phase entry—budding of a daughter yeast cell—depends  
559 on sufficient production of proteins needed to replicate the genome and essential  
560 cellular structures. Accelerating the production of these factors can thus shorten this  
561 period. We measured the fraction of naïve and [*BIG*<sup>+</sup>] cells in the G1 phase of the cell  
562 cycle, by counting the fraction of unbudded cells (i.e. cells in G1). For naïve cells, 36.2%  
563 were in G1, whereas only 27.2% of [*BIG*<sup>+</sup>] cells were in G1, a ~25% reduction  
564 (**Supplementary Fig. 6C**,  $p=0.0017$ , unpaired t-test). These data suggest that the cell  
565 cycle checkpoint for progression to S phase remains intact, and that a shortened G1  
566 stage in [*BIG*<sup>+</sup>] cells is consistent with their increased protein synthesis. [*BIG*<sup>+</sup>] cells are  
567 not larger during exponential phase growth (**Supplementary Fig. 3**), suggesting that

568 their cell size checkpoint remains intact. Cells in stationary phase, by contrast, which do  
569 not have the nutrient content needed to progress to S phase, may continue to  
570 accumulate mass at a faster rate, contributing to their larger size.

571

### 572 **[*BIG*<sup>+</sup>] cells enact an altered translational program**

573 Because relative mRNA expression levels were only subtly altered in [*BIG*<sup>+</sup>] cells during  
574 exponential growth phase, but multiple measures of translation were increased, we  
575 considered the possibility that the phenotypes of the prion might be due to changes in  
576 protein levels of particular open reading frames. To test this idea, we capitalized on the  
577 dominance of [*BIG*<sup>+</sup>] in genetic crosses (**Fig. 4B**), mating haploid cells harboring the  
578 prion to a genome-wide collection of N-terminal seamless superfolder-GFP fusions  
579 (“SWAT” library; ~5,500 ORFs; (Weill et al., 2018)). Equivalent matings between naïve  
580 strains and this genome-wide collection served as controls. To control for the larger size  
581 of the [*BIG*<sup>+</sup>] cells, we assessed protein levels in these diploid strains in terms of the  
582 relative GFP levels (normalized by OD<sub>600</sub> and Z-scored) within the naïve and [*BIG*<sup>+</sup>]  
583 GFP-fusion collections separately. Mating and fluorescence measurements were  
584 performed in biological duplicate: the SWAT library was mated to two separate [*BIG*<sup>+</sup>]  
585 isolates alongside naïve controls. The reported OD<sub>600</sub>-normalized GFP levels are the  
586 mean of two technical duplicates of each biological duplicate. Protein levels measured  
587 in this way were generally well correlated between naïve and [*BIG*<sup>+</sup>] strains (Pearson’s  $r$   
588 = 0.76;  $p < 10^{-16}$ ), in concordance with our results from electrophoresis of total cellular  
589 protein. Yet many proteins were up- or down-regulated in [*BIG*<sup>+</sup>] cells.

590 Of the 4,233 fusions whose abundance could be robustly quantified across the  
591 four replicates ( $\sigma_Z$ -score < 1 for both naïve and [BIG<sup>+</sup>]), ~130 were differentially expressed  
592 in [BIG<sup>+</sup>] cells. Consistent with a bias toward enhanced translation, 81 were upregulated  
593 and 46 were downregulated (**Fig. 6I** and **Supplementary Table 3**). These proteins did  
594 not show any strong enrichment in physiochemical properties (see **Supplementary**  
595 **Text** for further discussion). Nor were they enriched in proteins encoded by the handful  
596 of known Pus4-pseudouridylated mRNAs (Carlile et al., 2014; Lovejoy et al., 2014;  
597 Schwartz et al., 2014). We also did not observe a widespread increase in expression of  
598 ribosomal proteins. We did, however, observe that proteins that were increased in  
599 [BIG<sup>+</sup>] cells had a modest decrease in their codon adaptation index (CAI) at the 5' end  
600 of their mRNAs relative to all genes (**Fig. 6J**), indicating that cells harboring the prion  
601 might more efficiently translate these messages. The dip in CAI that is typical in the 5'  
602 end of all genes, known as “translational ramping”, is thought to reflect the bias toward  
603 translational control near the beginning of ORFs (Frumkin et al., 2018; Tuller et al.,  
604 2010). (Lower CAI can both reduce the speed of elongation by requiring rarer tRNAs  
605 and lead to differences in mRNA structure that might also affect initiation or elongation  
606 efficiency.) These data are consistent with our luciferase reporter data in which rarer  
607 codons throughout the message output more protein in [BIG<sup>+</sup>] than in naïve cells (**Fig.**  
608 **6E** and **Supplementary Fig. 6B**), as well as the resistance of prion cells to the  
609 elongation inhibitor cycloheximide (**Fig. 6A**).

610 Many hits were logically connected to the enhanced translation, increased size,  
611 and shortened lifespan of [BIG<sup>+</sup>] cells. The 81 upregulated proteins included multiple

612 ORFs whose deletions are associated with decreased cell size (such as *PHO5*,  
613 *MRPS28*, *KAP122*, and *SWE1*) (Harvey and Kellogg, 2003; Jorgensen et al., 2002),  
614 increased chronological lifespan (*DIG2* and *UBX6*) (Garay et al., 2014), and extended  
615 replicative lifespan (*ENO1*, *MUB1*, *PHO87*, *PGM2*, and *YRO2*) (McCormick et al.,  
616 2015). Conversely, the 46 downregulated proteins included ORFs whose deletions are  
617 associated with increased cell size (*RNR4* and *RPL15B*) (Jorgensen et al., 2002;  
618 Perlstein et al., 2005) and decreased chronological lifespan (including *BUD23*, *SMI1*,  
619 *MHP1*, and *CLG1*) (Garay et al., 2014; Marek and Korona, 2013). Several proteins  
620 directly involved in translation control and ribosome biogenesis were also increased in  
621 [*BIG*<sup>+</sup>] cells, including *FHL1*, *MRPS28*, *MRPS16*, *RPL24B*, *RPS7A*, and *UTP10*  
622 (**Supplementary Fig. 6D**). The [*BIG*<sup>+</sup>]-regulated proteins also included 29 ORFs  
623 associated with differential sensitivity to rapamycin (including *SAS4*, *SNF1*, and *HCA4*)  
624 (Butcher et al., 2006; Dudley et al., 2005; Kapitzky et al., 2010), and 14 ORFs that are  
625 known genetic or physical interactors with TOR1 (including *GCD14* and *PAR32*)  
626 (Krogan et al., 2006; Varlakhanova et al., 2018). The functional breadth of these effects  
627 on the proteome, and their logical connection to factors involved in the control of  
628 proliferation, cell size, and lifespan suggest that the phenotypes of [*BIG*<sup>+</sup>] are likely  
629 derived from an altered translational regulation program that favors growth and  
630 proliferation at the expense of lifespan.

631

### 632 **Altered pseudouridylation in [*BIG*<sup>+</sup>] cells**

633 Our finding that pseudouridylation on tRNA was maintained at similar levels in [*BIG*<sup>+</sup>]

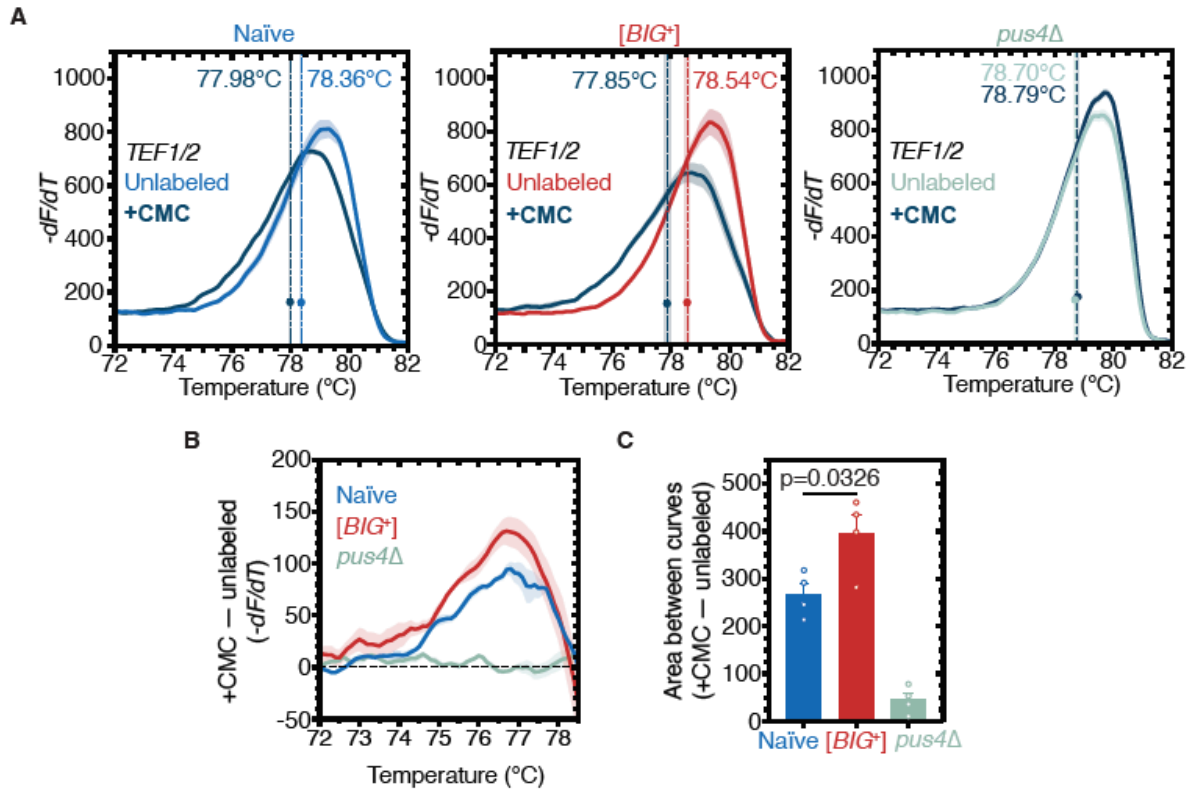

634  
635  
636  
637  
638  
639  
640  
641  
642  
643  
644  
645  
646  
647  
648  
649  
650

**Figure 7. [BIG<sup>+</sup>] has elevated pseudouridylation.**

(A) High-resolution melting curve analysis shows that U239 is pseudouridylated in *TEF1/TEF2* mRNA in both naïve and [BIG<sup>+</sup>] cells but not in cells that do not contain Pus4p. Left panel: naïve samples CMC-labeled (black) or unlabeled (blue). Middle panel: [BIG<sup>+</sup>] samples CMC-labeled (black) or unlabeled (red). Right panel: *pus4*Δ samples CMC-labeled (black) or unlabeled (turquoise). Dots mark the geometric center of four replicates, bisected by a dashed line with shaded area representing standard error of the mean. The melting temperature (*T<sub>m</sub>*) of this point is also displayed. Solid lines representing melting curves are the mean of four replicates, with shaded areas representing standard error of the mean. (B) The difference in melting temperature behavior (*df/dT*) between CMC-labeled and CMC-unlabeled *TEF1/TEF2* mRNA amplicons is larger in [BIG<sup>+</sup>] cells than in naïve cells, suggesting higher levels of pseudouridylation of U239 in [BIG<sup>+</sup>] cells. Solid line represents mean of four replicates, with shaded areas showing standard error of the mean. (C) The difference in area between the melting curves of CMC-labeled and CMC-unlabeled *TEF1/TEF2* mRNA amplicons is greater in [BIG<sup>+</sup>] cells than in naïve cells, suggesting higher levels of pseudouridylation of U239 in [BIG<sup>+</sup>] cells. Bars represent the mean of four replicates, error bars indicate standard deviation, *p*=0.0326, unpaired t-test.

651 cells (Fig. 5B) led us to wonder whether mRNA substrates of Pus4 were similarly  
652 modified. The best-documented mRNA target of Pus4 is the translation elongation  
653 factor *TEF1/TEF2*—whose position U239 is robustly pseudouridylated in a Pus4-  
654 dependent manner (Carlile et al., 2014; Lovejoy et al., 2014; Schwartz et al., 2014).

655 These paralogous genes encode identical copies of the EF-1 alpha translation  
656 elongation factor, which binds to aminoacylated tRNAs—specifically the T arm stem-  
657 loop that is pseudouridylated by Pus4 (Dreher et al., 1999)—and delivers them to the A-  
658 site of the ribosome during translation elongation (Schirmaier and Philippsen, 1984).  
659 Using the aforementioned qPCR-based method for detecting pseudouridylation, we also  
660 found that *TEF1/TEF2* was pseudouridylated in our wild-type cells (both naïve and  
661 [*BIG*<sup>+</sup>]), in a Pus4-dependent manner (**Fig. 7A**). Sanger sequencing verified that the  
662 modified position was identical to that previously annotated in the literature  
663 (**Supplementary Fig. 7A**).

664 The majority of studies on yeast prions have characterized them as decreasing  
665 or eliminating activity (Garcia and Jarosz, 2014). We recently discovered one notable  
666 exception, however, in which the [*SMAUG*<sup>+</sup>] prion can increase the activity of the protein  
667 that encodes it (*Vts1*; (Chakravarty et al., 2019). We thus examined if there was an  
668 altered level of pseudouridylation of *TEF1/TEF2* mRNA—if altered levels affected  
669 protein activity, this could be one possible mechanism linked to the altered translation  
670 program we found in [*BIG*<sup>+</sup>] cells. By quantifying differences in the melt curve shift after  
671 CMC labeling—an analysis made simpler for *TEF1/TEF2* than for tRNAs by the  
672 absence of other pseudouridylated positions flanking U239—we observed an increase  
673 in the signal of pseudouridylation in [*BIG*<sup>+</sup>] cells relative to naïve (**Fig. 7B–C** and  
674 **Supplementary Fig. 7B**). Together these data demonstrate that the catalytic function of  
675 Pus4 is retained in [*BIG*<sup>+</sup>] cells, and can be enhanced for certain substrates, contrasting



676 with the classical view of prions as being loss-of-function protein conformations. They  
 677 also provide a novel example of how RNA modification can be epigenetically controlled.

678

679 **Epigenetic control of [BIG<sup>+</sup>]-like phenotypes in wild yeast**

680 Finally we tested whether protein-based epigenetic control of cell size, protein  
 681 synthesis, or localization is present in wild yeast populations. Protein chaperones are

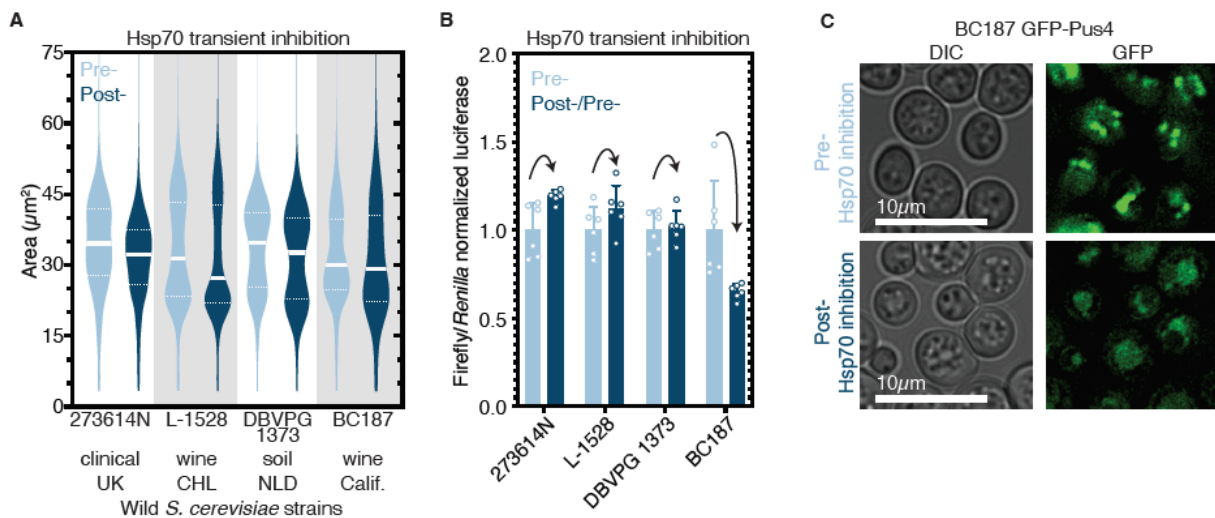

682

683 **Figure 8. Epigenetic control of [BIG<sup>+</sup>]-like phenotypes in wild yeasts.**

684 (A) Transient inhibition of Hsp70 in diploid wild yeast strains from different niches around the globe leads  
 685 to permanent reduction in cell size. Violin plots show all data from three biological replicates of each  
 686 strain, light blue are cells before Hsp70 inhibition (“Pre-“), dark blue are cells after transient Hsp70  
 687 inhibition and recovery (“Post-“). Solid white line bisecting each distribution indicates mean; dotted lines  
 688 indicate upper and lower quartiles. 273614N: clinical isolate from United Kingdom, Pre- vs. Post-  
 689  $p < 0.0001$ . L-1528: wine isolate from Chile, Pre- vs. Post-  $p < 0.0001$ . DBVPG 1373: soil isolate from the  
 690 Netherlands, Pre- vs. Post-  $p < 0.0001$ . BC187: wine isolate from California, Pre- vs. Post-  $p < 0.0001$ .  
 691 Kolmogorov-Smirnov test for all. (B) Transient inhibition of Hsp70 in wild yeast strains leads to permanent  
 692 changes in protein synthesis capacity. Firefly reporter contains the “normal” suite of codons, which is  
 693 normalized to internal control *Renilla* luciferase. Bars represent the mean of normalized luciferase values  
 694 for six biological replicates, error bars are standard deviation. Light blue “Pre-“ are cells prior to Hsp70  
 695 inhibition, dark blue “Post-“ are cells after transient Hsp70 inhibition and recovery. A value above 1.0 for  
 696 the dark blue bars indicates that the normalized translation capacity has increased after prion curing, a  
 697 value below 1.0 indicates that capacity has decreased. 273614N  $p = 0.0134$ , L-1528  $p = 0.1397$ , DBVPG  
 698 1373  $p = 0.7428$ , BC187  $p = 0.0125$ , unpaired t-test for all. (C) Transient inhibition of Hsp70 in BC187 wine  
 699 isolate leads to permanent changes in Pus4p expression pattern, suggesting that its conformation may  
 700 also be epigenetically regulated in wild strains. Prior to inhibition (top), cells show notable bright punctate  
 701 structures; after transient inhibition and recovery (bottom), expression pattern becomes much more  
 702 diffuse.

703 essential regulators of prion propagation in wild strains just as they are in laboratory  
704 strains (Halfmann et al., 2012; Jarosz et al., 2014). To block the passage of prions in  
705 wild yeasts, we transiently expressed a dominant negative variant (*SSA1*<sup>K69M</sup>) of  
706 Hsp70—the chaperone that is essential for [*BIG*<sup>+</sup>] propagation (**Fig. 4F**)—in twenty wild  
707 *S. cerevisiae* strains isolated from a variety of environments around the world (Cubillos  
708 et al., 2009; Itakura et al., 2019). We measured the size of cells before and after this  
709 chaperone curing and found four isolates—'273614N', (clinical, Newcastle, UK); 'L-  
710 1528', (fermentation, Cauquenes, Chile); 'DBVPG1373', (soil, Netherlands); 'BC187',  
711 (barrel fermentation, Napa Valley, California)—that became smaller after curing (**Fig.**  
712 **8A**).

713 To test whether the four isolates that became smaller upon curing had altered  
714 protein synthesis, we transformed them with the same luciferase reporters we tested in  
715 laboratory [*BIG*<sup>+</sup>] cells. We normalized the firefly reporters with variable codons to the  
716 *Renilla* control for cured strains, and then normalized these to the corresponding  
717 uncured strain values. Two of the four isolates showed significant changes to translation  
718 (**Fig. 8B**). BC187 yielded the largest change upon curing, a ~40% reduction in  
719 translation of a firefly containing a “normal” suite of codons, similar to what we had  
720 observed with [*BIG*<sup>+</sup>] cells generated in the laboratory.

721 We next examined the localization of Pus4 in BC187 and its Hsp70 'cured'  
722 derivative. We transformed uncured and cured strains with a plasmid expressing GFP-  
723 tagged Pus4 protein, and imaged cells using epifluorescence microscopy. In uncured  
724 cells we observed distinct large puncta of Pus4. In contrast, in cured BC187 cells, the

725 signal was far more diffuse; few cells had large puncta compared to uncured cells (**Fig.**  
726 **8C**).

727 These observations suggest that epigenetic, and potentially prion-mediated  
728 control of mechanisms like the [BIG<sup>+</sup>] prion that we have described here, may be  
729 widespread in nature.

730

## 731 **DISCUSSION**

732 Epigenetic inheritance is most commonly thought to be driven by enzymes that modify  
733 chromatin and DNA. Here we show that an enzyme that catalyzes epigenetic  
734 modification of RNA can itself be controlled by an extrachromosomal epigenetic  
735 process: a self-templating protein conformation that persists over long biological  
736 timescales. This prion-based mechanism engages an altered translational program to  
737 favor a '*live fast, die young*' strategy.

738 RNA modifications can facilitate multiple steps of protein synthesis, including  
739 tRNA charging, ribosome biogenesis, and decoding (Sarin and Leidel, 2014). The  
740 epigenetic conformational control of an ancient RNA modifying enzyme that we have  
741 discovered provides a new translational control mechanism that strongly impacts  
742 growth, proliferation, and lifespan. These data further define a type of 'recursive'  
743 epigenetics, in which epigenetically transmissible information occurs via a protein that is  
744 itself an epigenetic regulator—a protein that chemically modifies RNA. We found that  
745 prion cells not only maintain pseudouridylation activity, but that activity can be  
746 increased, even without a detectable increase in *PUS4* expression.

747           Although the protein that drives [*BIG*<sup>+</sup>] modifies RNA, changes to relative RNA  
748 abundance do not appear to drive these growth or aging phenotypes. No major changes  
749 to relative tRNA or mRNA levels in actively growth cells are associated with [*BIG*<sup>+</sup>].  
750 Instead, changes to the translational control of numerous genes are logically connected  
751 to these phenotypes.

752           It is difficult to predict a priori how the increased level of pseudouridylation in  
753 *TEF1/TEF2* mRNA might impact the protein's activity. Due to a paucity of studies, the  
754 effects of pseudouridylation in ORFs is not well understood. Although the modification  
755 has been found to stabilize some mRNAs (Kariko et al., 2008; Nakamoto et al., 2017),  
756 recent evidence points to single sites slowing translation and altering decoding accuracy  
757 (Eyler et al., 2019). Given that our data are consistent with a change to translation  
758 elongation in [*BIG*<sup>+</sup>] cells, and the major non-tRNA substrate of Pus4 is the *TEF1/TEF2*  
759 mRNA, encoding a central elongation factor that binds to and escorts tRNAs to the  
760 ribosome, future studies should address whether Pus4-dependent modification of  
761 *TEF1/TEF2* mRNA plays a role in the phenotypes of [*BIG*<sup>+</sup>]. Apart from its  
762 pseudouridylation activity, the bacterial homolog of Pus4, *truB*, also harbors important  
763 tRNA chaperone activity (Keffer-Wilkes et al., 2016). It remains to be tested, however, if  
764 this activity is conserved in eukaryotic versions of the enzyme, and if so, what role if any  
765 that it plays in [*BIG*<sup>+</sup>].

766           Translation is a rate-limiting step for growth in many organisms (Polymenis and  
767 Schmidt, 1997; Sonenberg, 1993) and is often activated in human cancers (Sonenberg  
768 and Hinnebusch, 2009). Other prions in yeast also affect translation, including [*PSI*<sup>+</sup>]

769 and [*MOD*<sup>+</sup>] (Baudin-Baillieu et al., 2014; Suzuki et al., 2012). However, in contrast to  
770 [*BIG*<sup>+</sup>], they lead to losses of their underlying protein activities, impairing translation and,  
771 in turn, growth in many conditions (Baudin-Baillieu et al., 2014; Cox, 1965; Suzuki et al.,  
772 2012). In contrast, in [*BIG*<sup>+</sup>] cells, translation is amplified. This is also notable for the fact  
773 that we have not found an example in the literature of a mutation that enhances  
774 translation under nutrient replete conditions. Moreover, [*BIG*<sup>+</sup>] did not require the  
775 amyloid severing activity of Hsp104 that is critical for propagation of [*MOD*<sup>+</sup>] and [*PSI*<sup>+</sup>],  
776 but rather the activity of a more generalist chaperone, Hsp70. A detailed description of  
777 the molecular conformation of Pus4 protein in [*BIG*<sup>+</sup>] cells, how it enables  
778 pseudouridylation activity, and how it promotes translation are ripe questions for future  
779 investigation.

780 Translation is also coupled to cell size, proliferation and lifespan (Ecker and  
781 Schaechter, 1963; Kaeberlein and Kennedy, 2007; Lloyd, 2013; Steffen and Dillin,  
782 2016; Tanenbaum et al., 2015). Cell size, which is determined in large part by activity of  
783 the TOR pathway (Fingar et al., 2002; Zhang et al., 2000), has been inversely  
784 correlated with lifespan (Anzi et al., 2018; He et al., 2014; Yang et al., 2011), and older  
785 cells are larger (Egilmez et al., 1990). Moreover, molecules that extend lifespan, such  
786 as rapamycin, also influence cell size and/or proliferation by restricting the cell's  
787 translation capacity (Beretta et al., 1996; Terada et al., 1994). Here we describe an  
788 epigenetic paradigm that links all of these fundamental cellular properties: translation,  
789 cell size, proliferation, and lifespan. In future studies we would like to explore to what  
790 extent the effect on lifespan may serve as material for selection to favor or disfavor

791 [*BIG*<sup>+</sup>]. At present, we favor a hypothesis in which the aging defect of [*BIG*<sup>+</sup>] cells is due  
792 at least in part to pleiotropic consequences of their increased proliferation and  
793 translation capacity. Although these features have already been linked to aging in  
794 genetic studies, we also note that such theories of antagonistic pleiotropy in aging are  
795 not without controversy (Hughes and Reynolds, 2005).

796 Replicative lifespan of wild budding yeast strains has been measured and varies  
797 widely (Kaya et al., 2015). Variation has been associated with changes in oxidative  
798 phosphorylation, respiration, and differences in metabolite biosynthesis. Genetic  
799 screening has also offered some insight as to the genetic basis of this variability  
800 (McCormick et al., 2015). Lastly, genetic mapping efforts have identified polymorphisms  
801 underlying natural chronological lifespan variation (Kwan et al., 2011). The genetic  
802 architecture of natural lifespan, both chronological and replicative, remains obscure,  
803 however. Our data further demonstrate that it can be subject to strong epigenetic  
804 control.

805 We note that prior studies have characterized genetic links between cell size and  
806 lifespan in yeast—mutants that make cells larger tend to age faster, and older cells tend  
807 to be larger than younger cells (Neurohr et al., 2019; Yang et al., 2011; Zdrag-Tecza et  
808 al., 2009). [*BIG*<sup>+</sup>] provides an epigenetic mechanism to heritably alter these  
809 relationships. Exerting epigenetic, rather than genetic, control over basic cell growth  
810 behaviors could be valuable in the face of fluctuations between nutrient-replete and  
811 nutrient-poor conditions. Theory predicts that such mechanisms can have strong  
812 adaptive value when the frequency of fluctuations is rare relative to the generation time

813 of the organism (King and Masel, 2007). In agreement with these inferences, our  
814 modeling quantitatively described the long-run selective advantage of this '*live fast, die*  
815 *young*' prion state that we measured, illustrating the importance of considering not only  
816 steady-state phenotypes but also the ecological context in which prion states are  
817 expressed. Of particular relevance to this point is our data demonstrating that transient  
818 perturbation of Hsp70 activity can eliminate [*BIG*<sup>+</sup>]. Conditions in which the prion confers  
819 a growth benefit match those that promote its propagation. Conversely, conditions in  
820 which the prion is detrimental, shortening lifespan, are also those known to reduce  
821 chaperone expression, and could thereby cure the prion. The strong dependence of  
822 [*BIG*<sup>+</sup>] on chaperones therefore means that it is a natural epigenetic sensor of its  
823 environment.

824 Our data from wild yeast isolates demonstrates that cell size and protein  
825 synthesis are often under epigenetic control in nature. Exploring whether a [*BIG*<sup>+</sup>]-like  
826 epigenetic mechanism that promotes proliferation in nutrient replete conditions is  
827 conserved in metazoans is a major goal for the future. Indeed cancer cells also  
828 experience frequent oscillations in their environments: as tumors grow and metastasize,  
829 cells are exposed to shifting gradients of oxygen and glucose that influence their growth  
830 rate (Martinez-Outschoorn et al., 2017; Schito and Semenza, 2016). Regulation of cell  
831 physiology in these situations is best understood at the level of transcriptional changes  
832 due to the relative ease of profiling them, but multiple lines of evidence suggest that  
833 translational hyperactivation can also fuel pathological proliferation (Robichaud et al.,  
834 2019). Our discovery of a protein-based mechanism that changes cell growth via

835 engagement of an altered translational program argues for greater investigation into the  
836 epigenetic control of post-transcriptional processes, in both normal biology and disease.

837

## 838 **ACKNOWLEDGEMENTS**

839 We gratefully acknowledge Rebecca Freilich and Alan Itakura (Stanford University),  
840 Mike Harms (University of Oregon), and Gabriel Neurohr (ETH Zürich) for their review of  
841 the manuscript, and members of the Jarosz laboratory for helpful discussions. We thank  
842 Maya Schuldiner (Weizmann Institute) for the generous gift of the SWAT GFP library.  
843 We thank Kathrin Leppek and Maria Barna (Stanford University) for assistance with  
844 polysome gradients and profiling and the use of their instrument. We thank Rebecca  
845 Zabinsky and Thomas Lozoski (Stanford University) for help with RNA-sequencing  
846 analysis. We thank Adam Fries for assistance with microscopy and the Genomics and  
847 Cell Characterization Core Facility for assistance with RNA quantification (Institute of  
848 Molecular Biology, University of Oregon). DMG was supported by postdoctoral  
849 fellowships from the NIH (F32-GM109680), Ford Foundation, and the Burroughs  
850 Wellcome Fund Postdoctoral Enrichment Program (award number 1015119), in addition  
851 to the University of Oregon, and a Pilot grant from the University of Washington Nathan  
852 Shock Center (NIH P30AG013280). EAC was supported by an NSF Graduate Research  
853 Fellowship. CMJ was supported by a postdoctoral fellowship from the NIH (F32-  
854 GM125162). This work was also supported by grants to DFJ from the National Institutes  
855 of Health (NIH-DP2-GM119140), the National Science Foundation (NSF-CAREER-  
856 MCB116762), a Searle Scholar Award (14-SSP-210), a Kimmel Scholar Award (SFK-



857 15-154), and a Science and Engineering Fellowship from the David and Lucile Packard  
858 Foundation.

859

## 860 **AUTHOR CONTRIBUTIONS**

861 DMG, EC, and DFJ conceived and designed the project. DMG, EC, CMJ, MT and AD  
862 performed the experiments and analyzed data. CMJ implemented the modeling. MK  
863 supervised the replicative aging experiments. DMG, EC, CMJ, and DFJ wrote the  
864 manuscript. DFJ and DMG supervised the project.

865

## 866 **COMPETING INTERESTS STATEMENT**

867 The authors have no competing interests to declare.

## Supplemental Figure 1

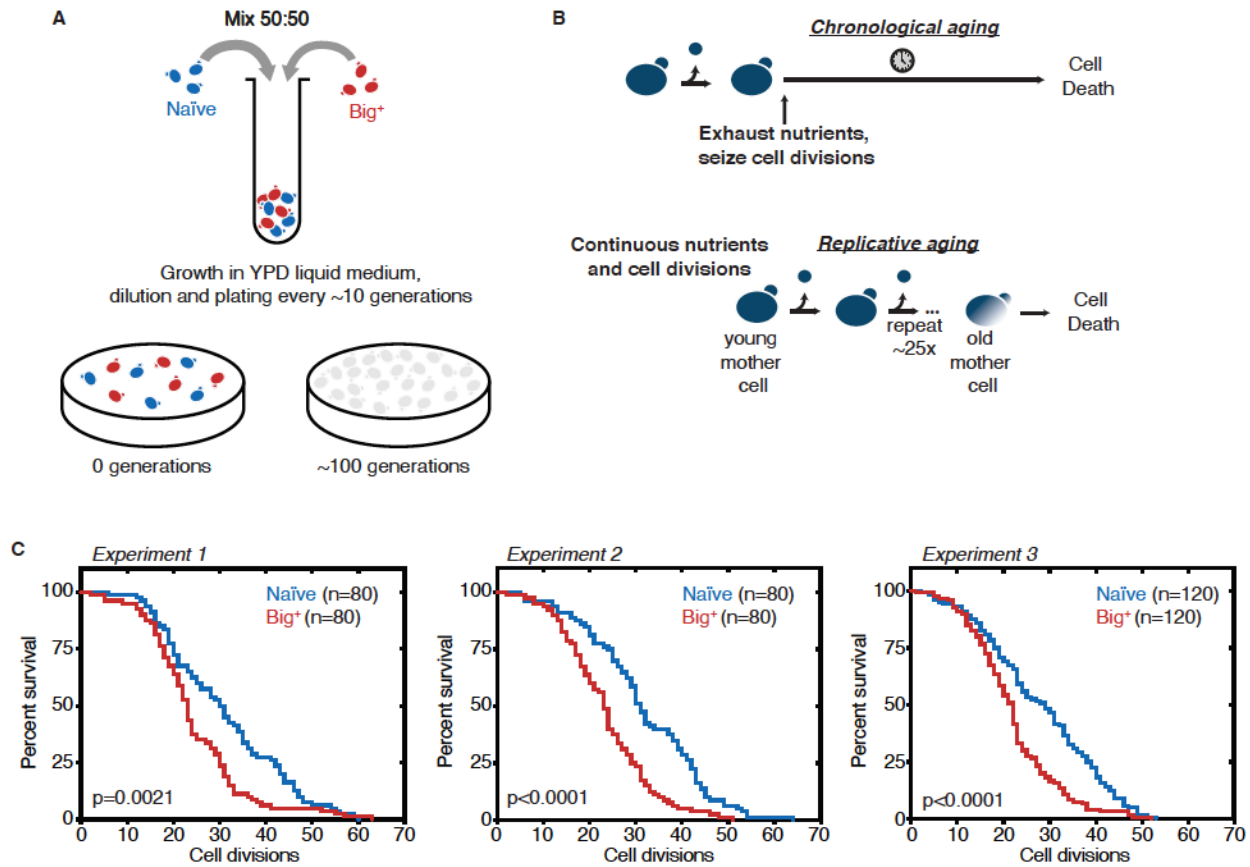

868

869

### Supplementary Figure 1. Probing lifespan of Big<sup>+</sup> cells.

870

(A) Experimental scheme for growth competition experiment associated with **Figure 1B**.

871

(B) Experimental scheme for chronological and replicative lifespan measurements

872

associated with **Figure 1C–D**. (C) Results from three independent RLS experiments, as

873

combined into **Figure 1D**. Experiment 1: n=80 per strain, p value = 0.0021, by Gehan-

874

Breslow-Wilcoxon Test. Median survival: naïve=30.5 generations, Big<sup>+</sup>=24 generations.

875

Experiment 2: n=80 per strain, p value < 0.0001, by Gehan-Breslow-Wilcoxon Test.

876

Median survival: naïve=31 generations, Big<sup>+</sup>=23 generations. Experiment 3: n=120 per

877

strain, p value < 0.0001, by Gehan-Breslow-Wilcoxon Test. Median survival: naïve=29

878

generations, Big<sup>+</sup>=22 generations.

## Supplemental Figure 2

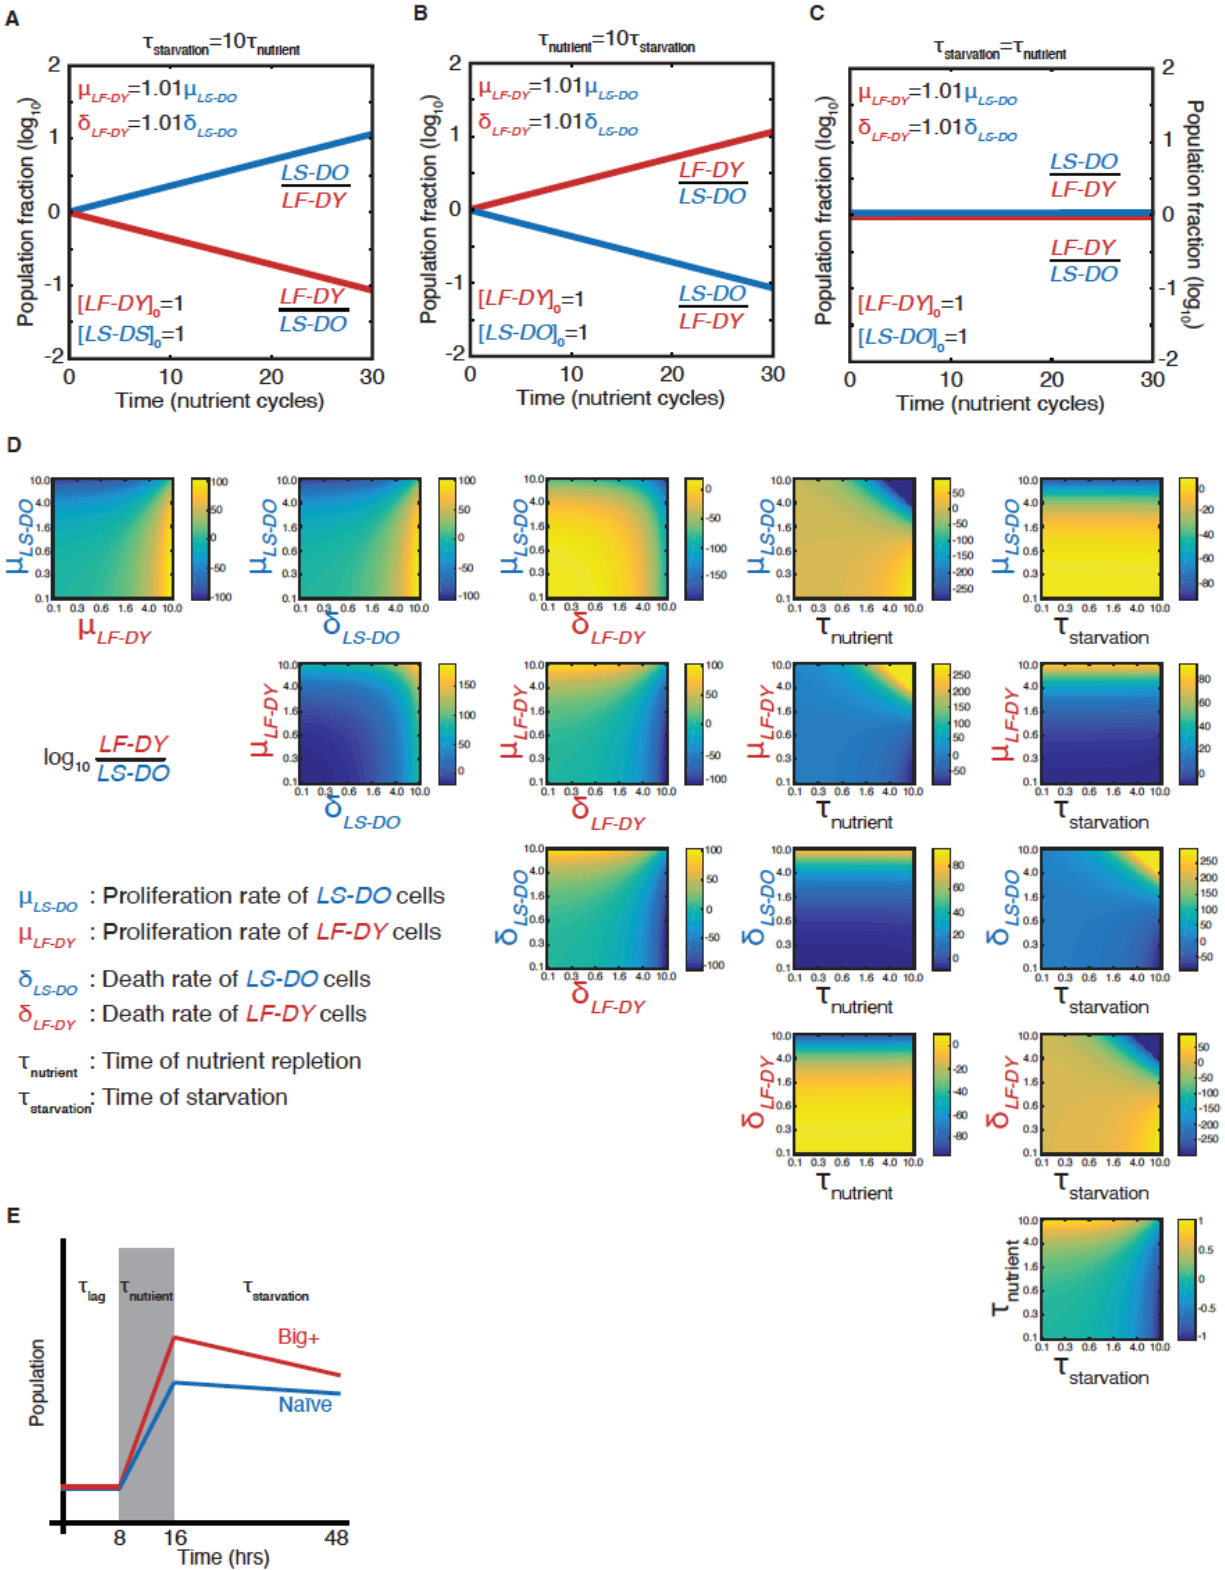

880 **Supplementary Figure 2. Modeling a reversible epigenetic live fast and die young**  
881 **strategy.**

882 Time-resolved simulations when **(A)** the period of starvation is ten times the period of  
883 nutrient repletion; **(B)** the period of nutrient repletion is ten times the period of  
884 starvation; and **(C)** the two nutrient regimes are of equal length. **(D)**. Phase space  
885 representations of the simulated final population fraction (ratio of *LF-DY* to *LS-DO*) after  
886 30 cycles of nutrient repletion and starvation, as in **Fig. 2C**. Indicated on the ordinate  
887 and abscissa of each panel are the parameters that were varied to generate each  
888 phase space. Parameters were varied over two orders of magnitude, as indicated. All  
889 other parameters were set to the baseline values as shown in **Supplementary Table 1**.  
890 **(E)** Schematic of parameters needed to model competitive growth experiment. During  
891  $\tau_{\text{lag}}$ , we assume that there is no change in population ratio. During  $\tau_{\text{nutrient}}$ , we require the  
892 exponential growth constants, and during  $\tau_{\text{starvation}}$ , we require the exponential decay  
893 constants (assuming cell death is a first-order process).

## Supplemental Figure 3

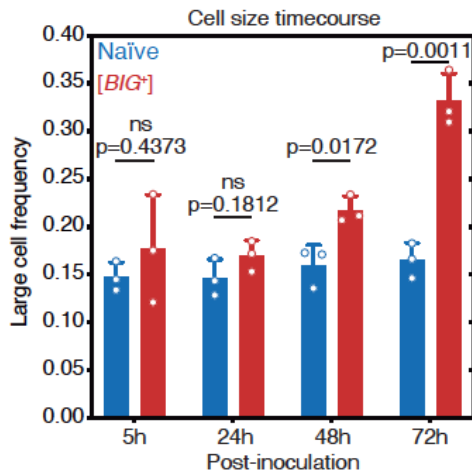

894  
895  
896  
897  
898  
899  
900  
901  
902  
903  
904  
905

### Supplementary Figure 3. The large cell phenotype of Big<sup>+</sup> emerges during the growth of a culture.

The large phenotype of Big<sup>+</sup> cells was stronger after three days of growth than after two days of growth (four days of growth yielded similar differences in cell size as for three days of growth, data not shown). The phenotype was not observed one day (24 hours) after inoculation or during the exponential growth phase (5 hours after inoculation). Bars represent the mean of three replicate strains—for which thousands of cells is measured for each—of the frequency of cells above the large cell threshold, error bars are standard deviation. Exponential growth (5 hours)  $p=0.4373$ , 24 hours  $p=0.1812$ , 48 hours  $p=0.0172$ , 72 hours  $p=0.0011$ ; unpaired t-test for all.

## Supplemental Figure 4

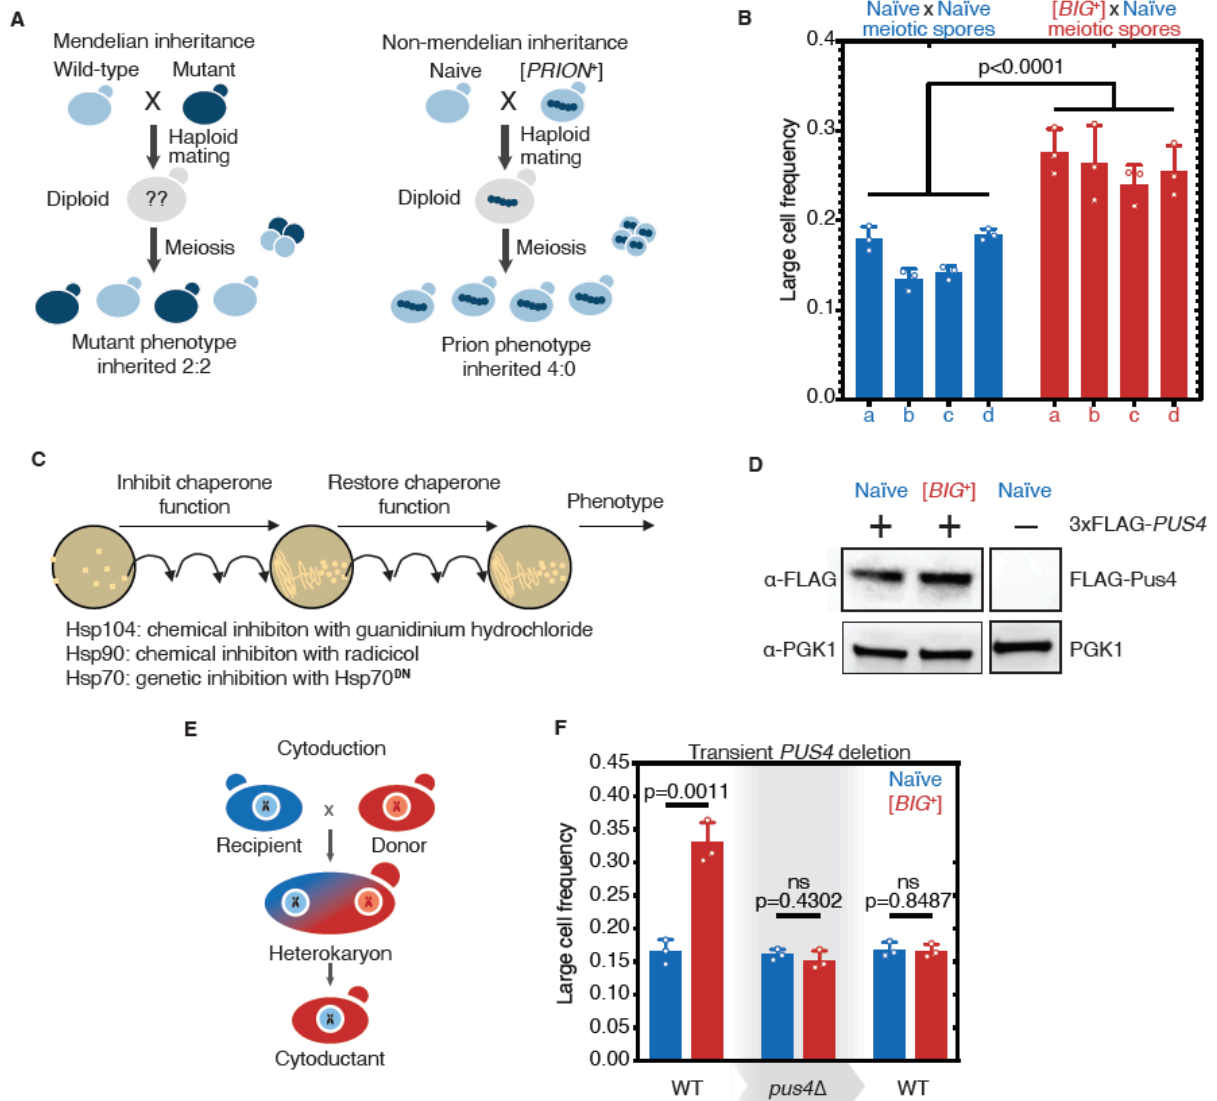

906  
907  
908

### Supplemental Figure 4. Tests for prion-like patterns of inheritance and dependence on Pus4 for [BIG<sup>+</sup>].

909 (A) In contrast to mutations, which when arising from one parent are inherited in half of  
910 the meiotic progeny, prion-based traits can be inherited in all meiotic progeny. (B)  
911 Additional pairs of tetrads are shown for naïve and [BIG<sup>+</sup>] crosses. Bars represent the  
912 mean frequency of cells above the large cell threshold from three replicates, for which  
913 thousands of cells were measured for each replicate, error bars are standard deviation.  
914 Difference between the means of four tetrad spores between naïve and [BIG<sup>+</sup>],  
915 p < 0.0001, unpaired t-test. (C) Experimental scheme carried out to test the roles of three  
916 different protein chaperones in the propagation of [BIG<sup>+</sup>]. Cells were exposed to various  
917 chaperone inhibitors, then propagated without inhibition to allow cells to recover, and  
918 then tested for retention of the large cell phenotype that existed prior to inhibition. (See  
919 **Materials and Methods**.) (D) Pus4p is expressed at similar levels in naïve and [BIG<sup>+</sup>]

920 cells. Naïve or [*BIG*<sup>+</sup>] haploid cells were crossed to a strain containing a seamlessly N-  
921 terminally 3xFLAG-tagged *PUS4* gene, and total protein lysate was harvested, of which  
922 15µg was loaded onto a PAGE gel for each sample, and then probed with anti-FLAG, or  
923 anti-PGK1 loading control antibodies. Negative control lane (untagged strain) is from the  
924 same blot. (E) Prion-based traits can be passed through cytoduction that exchanges  
925 cytoplasmic material without exchange of nuclear material. (F) Transient deletion of  
926 *PUS4* blocks inheritance of the large cell trait from [*BIG*<sup>+</sup>] cells. Bars represent the mean  
927 frequency of cells above the large cell threshold from three replicates, for which  
928 thousands of cells were measured for each replicate, error bars are standard deviation.  
929 Differences between mean large cell frequencies of wild-type naïve and [*BIG*<sup>+</sup>] cells  
930 prior to deletion, p=0.0011; after deletion of *PUS4*, p=0.4302; after re-introduction of  
931 *PUS4*, p=0.8487; unpaired t-test for all.  
932

## Supplemental Figure 5

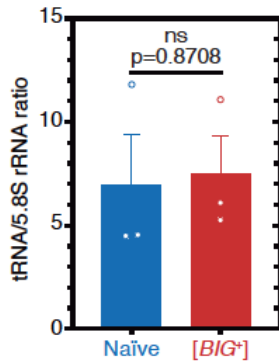

933

934

### Supplementary Figure 5. Unchanged tRNA levels in [BIG<sup>+</sup>].

935

tRNA levels are not different in [BIG<sup>+</sup>] cells compared to naïve cells when normalized to non-Pus4 target 5.8S rRNA (158nt). Measurements represent the mean of three replicates with standard deviation shown, p=0.8708.

936

937

938



## Supplemental Figure 6

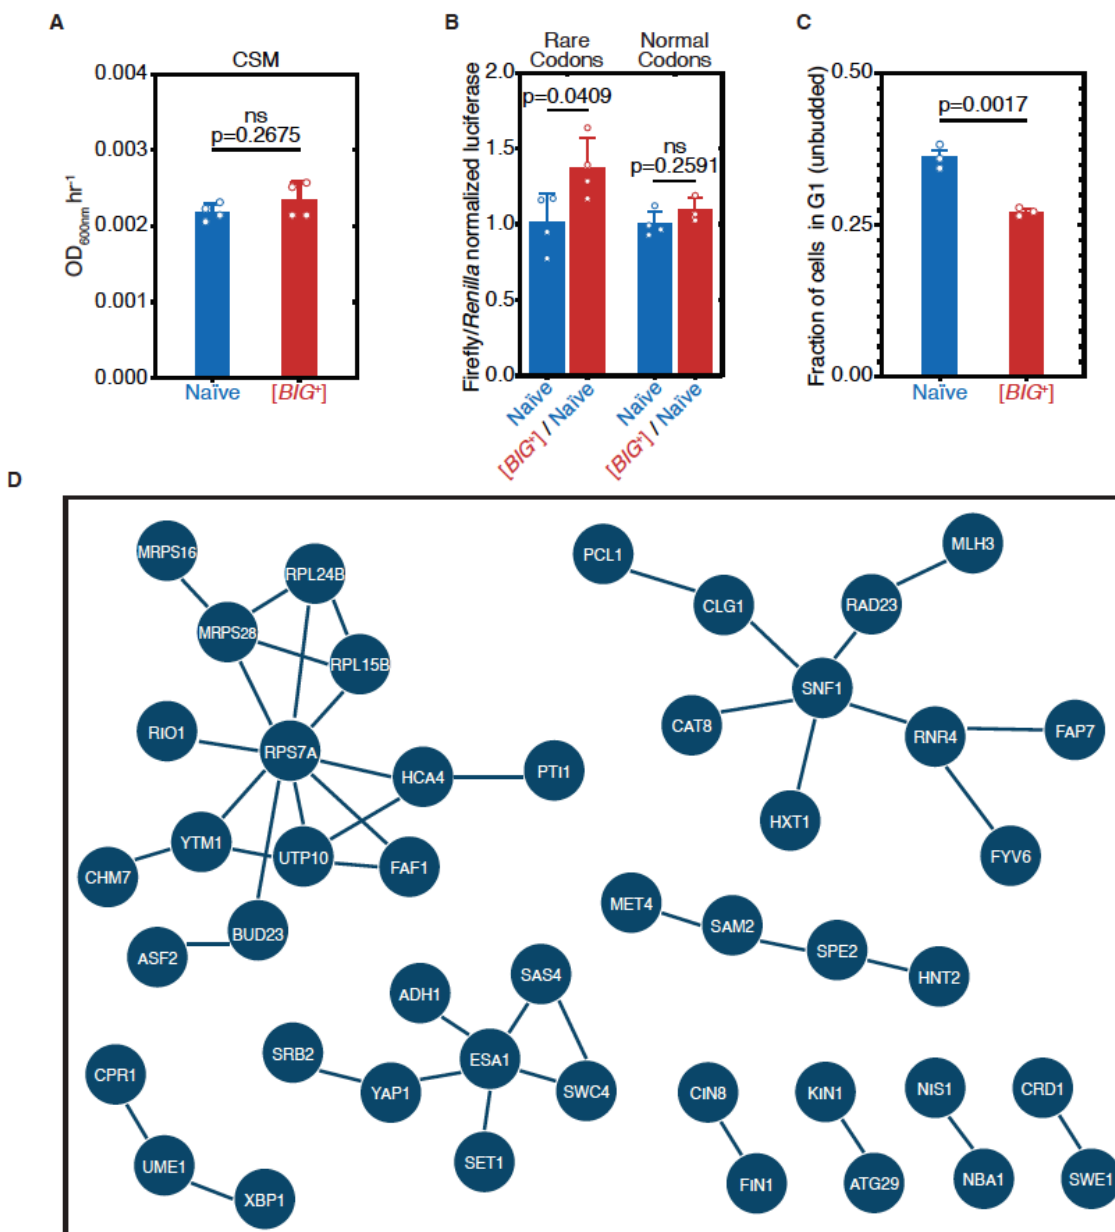

939

940 **Supplementary Figure 6. Altered cell cycle and translation in [BIG<sup>+</sup>].**

941 (A) [BIG<sup>+</sup>] cells do not exhibit enhanced proliferation in SD-CSM, a less nutrient-rich  
 942 medium than YPD (Fig. 1A). Bars represent mean of four replicates of maximum growth  
 943 rate (measured by the peak of the derivative of the growth data), error bars are standard  
 944 deviation, p=0.2675, unpaired t-test. (B) Original [BIG<sup>+</sup>] isolates translate more of a  
 945 Firefly luciferase reporter containing rare codons than naïve cells do. This effect is not  
 946 seen in an mRNA variant that encodes an identical protein but contains codons more  
 947 frequently used in yeast. Bars represent mean normalized luciferase values (an  
 948 invariable *Renilla* luciferase gene is co-expressed from the same plasmid) from four  
 949 replicates: rare codons p=0.0409, normal codons p=0.2591, unpaired t-tests for both.

950 (C) The ratio of unbudded cells (G1 phase of the cell cycle) to budded cells (G2 and S  
951 phases) is reduced in [*BIG*<sup>+</sup>]. Bars represent the mean of three replicates, error bars are  
952 standard deviation, p=0.0017, unpaired t-test. (D) Network representation of proteins  
953 whose levels change in [*BIG*<sup>+</sup>] vs naïve cells in GFP fusion screen (**Fig. 6I** and  
954 **Supplementary Table 3**), generated from STRING (string-db.org). Solid lines link  
955 proteins with genetic and/or physical interactions. The largest cluster—upper left—  
956 contains proteins involved in ribosome assembly and translation.  
957

958

## Supplemental Figure 7

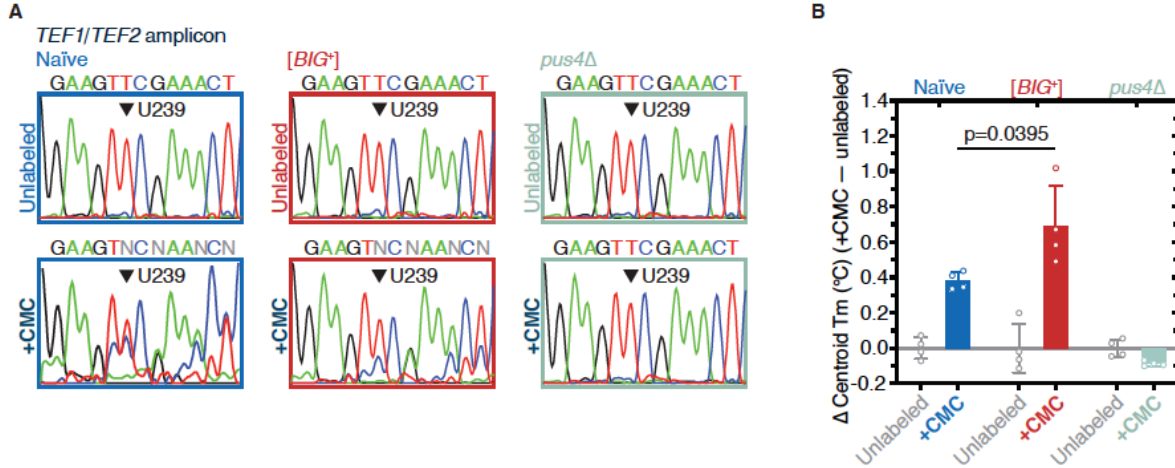

959  
960  
961  
962  
963  
964  
965  
966  
967  
968  
969  
970  
971  
972

### Supplementary Figure 7. $[BIG^+]$ has elevated pseudouridylation.

(A) Sanger sequencing profiles from control and CMC-labeled RNA from naïve,  $[BIG^+]$ , and *pus4Δ* cells. Naïve and  $[BIG^+]$  samples show characteristic mixed nucleotide assignments at previously annotated pseudouridylated position U239 in *TEF1/TEF2* mRNA, as well as more variable assignments 3' or this position, indicating the presence of a mixed population of amplicons containing CMC-pseudouridine induced mutations and deletions. (B) The difference in Tm between the curves of CMC-labeled and CMC-unlabeled *TEF1/TEF2* mRNA amplicons is greater in  $[BIG^+]$  cells than in naïve cells, suggesting higher levels of pseudouridylation of U239 in  $[BIG^+]$  cells. Each bar represents the mean of four technical replicates of the change in the centroid Tm, or the center of the distribution in both the x and y dimensions. Error bars are standard deviation. Difference between naïve and  $[BIG^+]$ ,  $p=0.0395$ , unpaired t-test.

973 **Supplementary Table 1: Parameter values used for the competitive fitness models**  
974 **shown in Figure 2 and Supplementary Figure 2.**

| Parameter  | Meaning                              | Value |
|------------|--------------------------------------|-------|
| $x_0$      | number of <i>LS-DO</i> cells         | n/a   |
| $x_1$      | number of <i>LF-DY</i> cells         | n/a   |
| $x_{00}$   | Initial number of <i>LS-DO</i> cells | 1     |
| $x_{10}$   | Initial number of <i>LS-DO</i> cells | 1     |
| $\mu_0$    | Growth rate of <i>LS-DO</i> cells    | 1     |
| $\mu_1$    | Growth rate of <i>LF-DY</i> cells    | 1.01  |
| $\delta_0$ | Death rate of <i>LS-DO</i> cells     | 1     |
| $\delta_1$ | Death rate of <i>LS-DO</i> cells     | 1.01  |
| $\tau_1$   | Time of nutrient repletion           | 1     |
| $\tau_2$   | Time of starvation                   | 1     |

975

976 **Supplementary Table 2: RNA-sequencing results**

977 See .xls file for TPMs for each gene in five replicates of naïve and five replicates of  
978 [*BIG*<sup>+</sup>]. Genes that showed significant differences are listed in a separate tab.

979

980 **Supplementary Table 3. Proteins whose expression is changed in [*BIG*<sup>+</sup>] cells.**

981 See .xls file

982

983 **Supplementary Table 4. Yeast strains, plasmids and oligonucleotides used in this**

984 **study.** See .xls file

## 985 **Supplementary Text**

986 We also examined the relationship between the proteins whose expression was altered  
987 in [*BIG*<sup>+</sup>] cells and other features related to gene expression, including mRNA  
988 secondary structure and pseudouridylation. Comparing the altered gene set to yeast  
989 transcripts with more double-stranded regions (Kertesz et al., 2010), no relationship  
990 emerged. We also compared the gene list to mRNAs that are pseudouridylated by Pus4  
991 (Carlile et al., 2014; Lovejoy et al., 2014; Schwartz et al., 2014), but did not see any  
992 significant correlation or changes among the limited number targets that contained  
993 Pus4-dependent pseudouridylation sites in both studies, and which were present in the  
994 SWAT gene collection (thirteen genes total). We conclude that the changes we observe  
995 for the translation of ~130 messages cannot be explained by Pus4-dependent  
996 pseudouridylation of their mRNAs. Given the limited reproducibility of mapping  
997 pseudouridylation sites transcriptome-wide in yeast from past studies, with large  
998 variability sample to sample (Safra et al., 2017; Zaringhalam and Papavasiliou, 2016),  
999 higher precision measurements in the future may offer the opportunity to compare anew  
1000 those mRNAs pseudouridylated by Pus4 and their protein levels in [*BIG*<sup>+</sup>] vs naïve cells.

1001 We also did not observe any relationship between genes with increased or  
1002 decreased protein levels in [*BIG*<sup>+</sup>] and isoelectric point (pI), protein length, protein half-  
1003 life, or GO category enrichments (process, component or function). We did however  
1004 observe several properties that were altered in both the genes that went up and those  
1005 that went down: hydropathy score (GRAVY)(Kyte and Doolittle, 1982), aromaticity, and  
1006 codon adaptability index (CAI), codon bias, and frequency of optimal codons. We

1007 observed some amino acid enrichments as well, with genes going up in [*BIG*<sup>+</sup>] being  
1008 depleted in leucine, phenylalanine, and proline, and those down depleted in  
1009 phenylalanine and aspartic acid.

1010 Finally, given that many of the effects that we measured were post-  
1011 transcriptional, we also examined genes with altered GFP levels (significantly up or  
1012 down) in [*BIG*<sup>+</sup>] cells using the MEME Suite, specifically for enrichment of predicted  
1013 binding sites for RNA binding proteins (Bailey et al., 2009). We found that binding sites  
1014 for the CCR4-NOT deadenylase complex were significantly enriched in our hits (motif alt  
1015 ID CNOT4; consensus motif ACACAWA; adjusted p-value 0.0135).

## 1016 MATERIALS AND METHODS

### 1017 Model formulation.

1018 To model the fitness of an epigenetic element for which growth in nutrient-replete  
1019 conditions is improved and survival in starvation conditions is worsened, we define the  
1020 following growth equations in nutrient-replete conditions:

1021

$$1022 \quad x_0 = x_{00}e^{\mu_0 t}$$

$$1023 \quad x_1 = x_{10}e^{\mu_1 t}$$

1024

1025 Where  $x_0$  represents the population of naive cells and  $x_1$  represents the population of  
1026  $[BIG^+]$  cells.  $\mu_0$  and  $\mu_1$  are the growth rates of naive and  $[BIG^+]$  cells, respectively. We  
1027 neglect the lag and stationary phases of growth, as the ratio between populations does  
1028 not change during this time.

1029

1030 Likewise, in starvation,

1031

$$1032 \quad x_0 = x_{00}e^{-\delta_0 t}$$

$$1033 \quad x_1 = x_{10}e^{-\delta_1 t}$$

1034

1035 Where  $\delta_0$  and  $\delta_1$  are the death rates of naive and  $[BIG^+]$  cells, respectively.

1036 We can furthermore define the times of nutrient repletion and starvation as  $\tau_1$  and  $\tau_2$ ,  
1037 respectively. Thus, for each cycle of nutrient/starvation, we can define the following  
1038 recursion relations:

1039

$$1040 \quad x_{0,i+1} = x_{0,i} e^{\mu_0 \tau_1}$$

$$1041 \quad x_{1,i+1} = x_{1,i} e^{\mu_1 \tau_1}$$

1042

$$1043 \quad x_{0,i+2} = x_{0,i+1} e^{-\delta_0 \tau_2}$$

$$1044 \quad x_{1,i+2} = x_{1,i+1} e^{-\delta_1 \tau_2}$$

1045

1046 And we can write an analytical expression for the ratio of populations after one  
1047 repletion/starvation cycle:

1048

$$1049 \quad x_0(t + \tau_1 + \tau_2) = x_0(t) e^{\mu_0 \tau_1 - \delta_0 \tau_2}$$

$$1050 \quad x_1(t + \tau_1 + \tau_2) = x_1(t) e^{\mu_1 \tau_1 - \delta_1 \tau_2}$$

1051

$$1052 \quad \frac{x_1}{x_0}(t + \tau_1 + \tau_2) = \frac{x_1(t)}{x_0(t)} e^{(\mu_1 \tau_1 - \delta_1 \tau_2) - (\mu_0 \tau_1 - \delta_0 \tau_2)}$$

1053

1054 For the purposes of the model, we consider only the ratio between populations in the  
1055 two epigenetic states (neglecting the total carrying capacity of the environment). The  
1056 above defines a recursion relation from which we can predict the ratio of naive and  
1057 [*BIG<sup>+</sup>*] cells after N cycles of nutrient repletion and starvation.

1058

1059 **Parameter estimation and prediction of competitive fitness.** The free parameters  
1060 defining the growth advantage and starvation disadvantage attributable to the



1061 epigenetic element in the model above ( $\mu_0$  and  $\mu_1$ ;  $\delta_0$  and  $\delta_1$ ) were determined by  
1062 Monte Carlo sampling of independent measurements of the growth and death rates  
1063 (**Fig. 2D–E**). To generate the ensemble of competitive fitness predictions shown in  
1064 **Figure 2C**, we randomly sampled growth and death rates for naive and [*BIG<sup>t</sup>*] cells  
1065 according to their experimentally determined distributions. The sampling was conducted  
1066 1000 times, and the prediction shown in **Figure 2F** is the median and 95% confidence  
1067 interval of the resulting ensemble of model predictions.

1068

1069 **Code and data availability.** All MATLAB code and data required to generate the  
1070 model predictions is available at [github.com/cjakobson/liveFastDieYoung](https://github.com/cjakobson/liveFastDieYoung). Code to  
1071 generate the figures is available upon reasonable request to [jarosz@stanford.edu](mailto:jarosz@stanford.edu).

1072

1073 **Bacterial strain growth.** Bacteria strains (for plasmid propagation) were cultured on  
1074 LB agar or liquid (Research Products International (RPI), Mount Prospect, IL).

1075

1076 **Yeast strains.** Yeast strains were cultured on either YPD agar or liquid (RPI) or SD-  
1077 Ura (Sunrise Scientific, Knoxville, TN), unless otherwise indicated. Strains were stored  
1078 as glycerol stocks (25% glycerol (Amersco, Solon, OH) in appropriate media) at -80 °C  
1079 and revived on YPD or amino acid dropout media before testing. Yeast were grown in  
1080 YPD at 30 °C on a TC-7 roller drum wheel (New Brunswick) unless indicated otherwise.  
1081 Yeast transformations were performed with a standard lithium–acetate protocol (Gietz et

1082 al., 1992). The *pus4Δ* strain was sourced from the BY4741 MATa haploid knockout  
1083 library (GE Dharmacon, Lafayette, CO).

1084

1085 **Strain constructions.** Most diploids were constructed by crossing indicated BY4741  
1086 haploids to the BY4742 parental strain (ATCC, Manassas, VA) by mixing a bead of cells  
1087 of each strain (from a single colony) together on a YPD plate and growing overnight at  
1088 30 °C. A small globule of this cell mixture was then re-streaked to single colonies on SD-  
1089 Lys-Met agar plates to select for diploids.

1090 Diploids constructed for the experiment presented in **Figure 4G** were made by  
1091 crossing [*BIG*<sup>+</sup>] or naïve haploids to the seamless GFP-Pus4 haploid strain. Due to  
1092 incompatibility of auxotrophic makers, diploids could not be selected on dropout plates  
1093 from cell mixtures. Instead, a pool of the mated cells was grown in several successive  
1094 competitions to allow diploids to outcompete haploid parents. Diploids were then  
1095 isolated from single colonies and imaged as described below.

1096 Sporulations were performed inoculating single diploid colonies in Pre-SPO liquid  
1097 media (YPD with 6% glucose) for 2 days at room temperature on a roller drum wheel.  
1098 Cells were then pelleted and washed twice in SPO media (1% Potassium Acetate  
1099 (Sigma, St. Louis, MO), 320 mg CSM-Met powder (Sunrise Scientific), 20 mg  
1100 Methionine (Sigma) per liter), and then diluted ten-fold into 3 mL cultures of SPO. These  
1101 cultures were incubated on a rotary wheel for one week at room temperature, before  
1102 dissecting tetrads on a Singer Instruments MSM400 (Somerset, England).

1103           The 3XFLAG-Pus4 strains were constructed using PCR combined with the  
1104 “Delitto Perfetto” method (Storici and Resnick, 2006). Canavanine mutants were  
1105 constructed by pelleting 500  $\mu$ L of a saturated YPD liquid culture, resuspending it in 100  
1106  $\mu$ LYPD and plating this on SD-Arg agar plates containing 60  $\mu$ g/mL canavanine  
1107 (Sigma), and growing for 2 days at 30 °C. Single canavanine resistant colonies were  
1108 picked and re-tested for resistance before further testing.

1109           Cytoductions were performed as described in (Chakrabortee et al., 2016a). A  
1110 BY4742 strain with a defective *KAR1* allele (*kar1-15*) was created as an initial recipient  
1111 for cytoplasmic transfer. This allele prevents nuclear fusion during mating while  
1112 permitting cytoplasmic transfer. The strain carries auxotrophic markers distinct from  
1113 those in the putative [*BIG*<sup>+</sup>] or naïve donor strains, and was also converted to petite with  
1114 growth on ethidium bromide (strains were grown in YPD with 25  $\mu$ g/mL ethidium bromide  
1115 for ~two-dozen generations before testing for growth on YP-glycerol). This allowed  
1116 cytoplasmic transfer to be scored through the restoration of mitochondrial respiration,  
1117 while selecting for auxotrophic markers unique to the recipient strain. The recipient and  
1118 donor strains were mixed together on YPD-agar and grown overnight, followed by  
1119 selection of heterokaryons and resulting haploid cytoductants on dropout media  
1120 (selecting for the BY4742 recipient strain markers) containing glycerol as a carbon  
1121 source. One more round of selection was used while replica-plating onto a dual-  
1122 selection agar plate (SD-Lys-Met) to confirm that the colonies were not diploids. One  
1123 additional round of propagation on a non-selective plate was performed before doing  
1124 “reverse cytoductions,” which were performed in the same way except selecting for

1125 BY4741 auxotrophy in recipient naïve strain. In the reverse cytoductions, the donors  
1126 were naïve or putative-[*BIG*<sup>+</sup>] BY4742 *kar1-15* cytoductants from the first round, and the  
1127 recipients were wild-type or *pus4*Δ naïve BY4741 petite cells.

1128         Transient *PUS4* deletion experiment strains were made by the Delitto Perfetto  
1129 method (Storici and Resnick, 2006). After deletion of *PUS4*, strains were propagated for  
1130 ~75 generations before phenotyping. The *PUS4* gene was re-introduced by homologous  
1131 recombination.

1132

1133 **Growth assays.** Biological replicates of each yeast strain were pre-grown in rich media  
1134 (YPD). We then diluted these saturated cultures 1:20 in sterile water and then  
1135 inoculated 3  $\mu$ L into 96-well humidified plates (Nunc Edge Plates (Thermo Scientific,  
1136 Waltham, MA)) with 150  $\mu$ L of YPD or SD-CSM per well. Cycloheximide (Sigma) was  
1137 added to growth media at 0.05 $\mu$ g/mL. Rapamycin (LC Laboratories, Woburn, MA) was  
1138 added to growth media at 10 $\mu$ M. Cell growth was monitored with continuous  
1139 measurements of OD<sub>600</sub> (~every 10 minutes) at 30°C over 96 hours using BioTek Eon or  
1140 Synergy H1 microplate readers (Winooski, VT). Timepoints plotted in bar graphs  
1141 correspond to the maximum proliferation rates calculated from growth data.

1142

1143 **Measurement of chronological lifespan.** For each strain, four single colonies were  
1144 picked from freshly streaked YPD plate, and grown in 5mL of Pre-sporulation media for  
1145 3 days on a roller drum wheel (New Brunswick Scientific, Edison, NJ) at 30°C. Cultures  
1146 were then pelleted and washed once with SPO media, and resuspended in 5mL of SPO

1147 media, and placed back on the roller drum wheel at 30°C. On days indicated, a dilution  
1148 was made of each replicate to achieve dozens to hundreds of colonies on a YPD plate,  
1149 which were then counted using a colony counter (Synbiosos Acolyte, Frederick, MD).  
1150 Dilution was ~100,000X at early stages of experiment, and later on was sometimes  
1151 empirically determined after significant cell death. We note that aging the cells in SPO  
1152 did not lead to significant acidification (pH of old cultures was found to be >5), as has  
1153 been reported for cells aged in YPD, which contains high levels of glucose that upon  
1154 metabolism leads to secretion of organic acids (Murakami et al., 2011).

1155

1156 **Measurement of replicative lifespan.** Replicative lifespan (RLS) was assessed using  
1157 the standard method of isolating virgin cells on agar YPD (2% glucose) plates, and then  
1158 separating their daughter cells at each cell division by micromanipulation and counting  
1159 the total number of daughters produced by each mother cell (Steffen et al., 2009;  
1160 Wasko et al., 2013). Strains were streaked from glycerol stocks onto YPD plates, and  
1161 allowed to grow at 30°C until individual colonies could be selected for each strain.  
1162 Colonies were lightly patched onto fresh YPD overnight and twenty cells were isolated  
1163 by microdissection from each patch. These cells were incubated at 30°C for  
1164 approximately two hours until they had formed daughter cells, at which time individual  
1165 virgin daughter cells were selected and arrayed as previously described (Steffen et al.,  
1166 2009) for lifespan analysis. From these, daughter cells were removed by  
1167 microdissection and counted approximately every 2 hours during the day. Plates were  
1168 maintained at 30°C during the day and placed at 4°C overnight. At least four

1169 independent replicates (arising from different colonies) of twenty individual mother cells  
1170 each were measured for each strain.

1171

1172 **Curing.** Three regimes of chaperone inhibition were tested: 1) transient exposure to a  
1173 dominant negative version of Hsp70 (Ssa1) to inhibit its activity (Chakrabortee et al.,  
1174 2016a; Jarosz et al., 2014) 2) transient exposure to Radicicol (LC Laboratories) to  
1175 inhibit Hsp90 activity (Chakrabortee et al., 2016a) 3) transient exposure to Guanidinium  
1176 Hydrochloride (Sigma) to inhibit Hsp104 activity (Ferreira et al., 2001).

1177       Regime 1 was performed by transforming cells with a plasmid, PDJ169,  
1178 harboring a dominant negative version of Hsp70 (Ssa1) as described previously  
1179 (Chakrabortee et al., 2016a; Jarosz et al., 2014; Lagaudriere-Gesbert et al., 2002).  
1180 Transformants were picked and re-streaked by hand or replica-pinned using a Singer  
1181 HDA robot a total of twelve times on SD-Ura to promote Ssa1<sup>DN</sup> expression.  
1182 (Anecdotally, we note that prion phenotypes are frequently cured with fewer than twelve  
1183 restreaks, but for reasons of technical throughput, twelve were used in this  
1184 experiment.) Then plasmids were eliminated by plating on media containing 5-fluoroortic  
1185 acid (SD-Ura + 0.1% 5-FOA + 50  $\mu$ g/mL uracil) and plasmid loss was verified by  
1186 replating on SD-Ura. Colonies were then tested for elimination of prion phenotypes.  
1187 Tested strains were compared to control strains that were restreaked in parallel on SD-  
1188 CSM plates.

1189       Regime 2 was performed by replica-pinning cells six subsequent times on YPD  
1190 agar plates containing 5  $\mu$ M radicicol, using a Singer HDA robot. After re-platings, cells

1191 were plated back onto YPD two subsequent times to facilitate recovery before being  
1192 tested for elimination of prion phenotypes. Tested strains were compared to control  
1193 strains that were replica-pinned in parallel on YPD plates.

1194 Regime 3 was performed like Regime 2 but with SD-CSM plates containing 0.5  
1195 g/L Guanidinium Hydrochloride. Tested strains were compared to control strains that  
1196 were replica-pinned in parallel on SD-CSM plates.

1197 Wild yeast strains were cured by transforming a uracil-selectable 2micron  
1198 plasmid (PDJ1222) encoding the aforementioned dominant negative version of Hsp70  
1199 (Ssa1), under control of a constitutive promoter (*pGPD*). Transformants were passaged  
1200 on selective media five times to allow growth of single colonies. Transformants were  
1201 then passaged three times on non-selective media (YPD) to permit plasmid loss, which  
1202 was confirmed by the lack of growth on selective media (SD-Ura).

1203

1204 **Strain competitions.** Single colonies were used to inoculate 5 mL YPD cultures which  
1205 were grown for 3 days on a roller drum wheel at 30°C. Cells were diluted 1000-fold and  
1206 then mixed in equal volumes to form 50:50 mixtures of either of the following: Naïve  
1207 Can<sup>S</sup> and [*BIG*<sup>+</sup>] Can<sup>R</sup>; or Naïve Can<sup>R</sup> and [*BIG*<sup>+</sup>] Can<sup>S</sup>. Before mixing cells, saturated  
1208 cultures were measured to have near equal cell densities, and “time zero” measurement  
1209 was made by plating the initial cell mixture and counting the number of Canavanine  
1210 resistant colony forming units (CFUs) relative to total CFUs. These initial strain mixtures  
1211 were then grown for 2 days on a roller drum wheel at 30°C, after which cells were  
1212 diluted 50,000-fold or 25,000-fold and plated on YPD or canavanine plates, respectively.

1213 These plates were grown at 30°C for 2 days before counting colonies. The liquid  
1214 cultures were diluted 1:1000 in 5 mL of fresh YPD, and this process was repeated nine  
1215 more times. Swapping of canavanine resistance between naïve and [*BIG*<sup>+</sup>] was done to  
1216 correct for the potential of canavanine resistance to influence cell growth, however in  
1217 our experiments the differences were negligible. Numbers of canavanine-resistant and  
1218 total colonies were compared relative to number of cells plated to determine the number  
1219 of naïve or [*BIG*<sup>+</sup>] colonies arising at each timepoint.

1220

1221 **Microscopy and cell size measurements.** Most microscopy was performed using a  
1222 Leica inverted epifluorescence microscope (DMI6000B) with a Hamamatsu Orca 4.0  
1223 camera. Cells were imaged after 3 days of growth in 5 mL YPD at 30°C. Saturated  
1224 cultures were diluted 10-fold with 1X PBS and briefly sonicated to break up cell clumps.  
1225 Differential interference contrast (DIC) images were taken at 20 millisecond exposure  
1226 time using a 63x/1.40 oil objective. Cell area was calculated using CellProfiler (3.1.5)  
1227 image analysis software ([www.cellprofiler.org](http://www.cellprofiler.org))(Carpenter et al., 2006). Large cell  
1228 threshold was set at one standard deviation above the cell area mean of the naïve cells.

1229 GFP microscopy data presented in **Figure 4G** was imaged similarly to above,  
1230 except that cells were grown in YPD for 24 hours.

1231 Cell size experiments using protein synthesis inhibitors (**Fig. 6A–D**): Conditions  
1232 were the same as above, with the following differences. Single colonies were inoculated  
1233 into YPD, YPD+cycloheximide (0.05µg/mL), or YPD+rapamycin (10µM) and grown for 4  
1234 days before imaging. (Very similar results were observed after 3 days of growth.) The



1235 following day, cultures were diluted into liquid YPD and grown for 3 days, after which  
1236 they were restreaked once onto YPD agar. Single colonies were then used to inoculate  
1237 liquid YPD cultures, grown for 3 days before imaging to test for the reappearance of the  
1238 large cell size phenotype.

1239 Data presented in **Figure 8C** was imaged similarly, except that cells were grown  
1240 in SC-Ura media for retention of the GFP-Pus4 expression plasmid, and imaged using a  
1241 GE DeltaVision Ultra microscope (Boston, MA).

1242

1243 **Microscopy Image processing.** ImageJ version 2.0.0-rc-69/1.52p, Build 269a0ad53f.  
1244 For GFP-Pus4 in laboratory *S. cerevisiae* (**Fig. 4G**): 1) using full-size images, rolling  
1245 background subtraction, radius of 50 pixels, 2) enhance contrast to allow 0.1% of pixels  
1246 to be saturated, 3) check that brightness and contrast are adjusted equivalently in each  
1247 image.

1248 For GFP-Pus4 in wild *S. cerevisiae* isolate BC187 (**Fig. 8C**): 1) using full-size images,  
1249 adjust brightness and contrast equivalently in both images, 2) set 50 x 50 pixel square  
1250 in area between cells and measure average intensity, 3) subtract this intensity from the  
1251 total image using the “Math” function.

1252

1253 **Luciferase assays.** Strains were transformed with PDJ512 and PDJ513. To maintain  
1254 the plasmids, we grew these cells in a synthetic complete medium containing nutrient  
1255 levels between those in SD and YPD formulations. Four independent transformants for  
1256 each sample were grown for 1 day in 150  $\mu$ L SC-Ura (Sunrise Scientific) per well in 96

1257 well plates at 30°C. Saturated cultures were then diluted 15X into fresh media in a new  
1258 96 well plate and grown until cultures reach OD 0.6, as determined by a Biotek Eon  
1259 plate reader. 20uL of each culture was added using multichannel pipette into a white  
1260 flatbottom 96-well microplates (E&K Scientific, Santa Clara, CA) already containing  
1261 20uL of room temperature 1X Passive Lysis Buffer from the Dual Luciferase Reporter  
1262 Assay System (Promega, Madison, WI). Cultures were then lysed by shaking at 300  
1263 rpm for 25 minutes at room temperature. *Renilla* and firefly luciferase activity was  
1264 measured using and 75  $\mu$ L injection volumes and otherwise default settings on a Veritas  
1265 luminometer (Turner Biosystems). pTH726-CEN-RLuc/minCFLuc (PDJ512) and  
1266 pTH727-CEN-RLuc/staCFLuc (PDJ513) were gifts from Tobias von der Haar (University  
1267 of Kent)(Addgene plasmids # 38210 and # 38211) (Chu et al., 2014).

1268 Final luciferase values were normalized to OD measurements of cultures to  
1269 account for cell density. We note, however, that [*BIG*<sup>+</sup>] cells did not have a general  
1270 growth advantage over naïve cells in SC-Ura, and when comparing optical density  
1271 measurements to those counting cells using a hemacytometer, we observed no  
1272 perturbation in the relationship between cell number and optical density for [*BIG*<sup>+</sup>] cells.

1273 For wild strains, we considered the possibility that curing could reverse multiple  
1274 epigenetic elements affecting plasmid copy number, transcription, or other elements of  
1275 gene expression apart from protein synthesis. Indeed, after normalizing *Renilla* or firefly  
1276 luciferase values to cell density, some strains have several fold-differences after curing,  
1277 although they were closely correlated irrespective of which firefly codon variant was  
1278 compared. Therefore, as for data presented in **Figure 6E**, for **Figure 8B** we also

1279 normalized firefly luciferase values to *Renilla* luciferase, which is expressed from the  
1280 same plasmid. This normalization procedure thus tests for differences in protein  
1281 synthesis that are codon-frequency dependent, i.e. a measure of translational efficiency.

1282

1283 **Polysome profiling.** Single colonies from two biological replicates per sample were  
1284 used to inoculate 5mL YPD cultures that were grown on a roller drum wheel at 30°C  
1285 overnight. Saturated cultures were added to 95mL of YPD in 500 mL flasks and shaken  
1286 at 225 rpm at 30°C until cultures reached OD 1.0. Five minutes prior to harvesting cells,  
1287 we added cycloheximide (Sigma) to final concentration of 100  $\mu$ g/mL to arrest  
1288 translation, by adding 1 mL of a 10 mg/mL stock solution (in ethanol) per culture, then  
1289 immediately swirling flask and putting back on shaker for 5 minutes 225 rpm 30°C to  
1290 permit the chemical to enter cells and arrest protein synthesis. Cultures were pelleted in  
1291 50 mL conical tubes for 3 minutes at 5000 rpm. After decanting supernatant, pellets  
1292 were quickly resuspend in ice-cold Polysome Lysis Buffer (Jan et al., 2014) (PLB)(20 mM  
1293 Tris pH 8.0, 140 mM KCl, 1.5 mM MgCl<sub>2</sub>, 100  $\mu$ g/mL cycloheximide, 1% Triton X-100,  
1294 RNase-free reagents), 250  $\mu$ L total PLB per sample. Resuspended pellets were then  
1295 flash frozen in liquid nitrogen. Pellets were weighed to ensure their weights were near  
1296 equal, and then thawed on ice. 250 $\mu$ L of additional ice cold PLB was added per sample,  
1297 making slightly over 0.5 mL per sample. Samples were then flash frozen in tiny pellets  
1298 (“yeast dippin’ dots”) by pipetting directly into a small dewar filled with liquid nitrogen  
1299 and a wire mesh basket nested inside. Tiny pellets were then stored at -80°C until lysis.  
1300 Samples were lysed using a Retsch Cryomill (Haan, Germany) with 25 mL canisters

1301 and the following program: pre-cool, then 12 cycles of 15 Hz x 3 minutes. Smears of  
1302 lysate were stained with Trypan blue and imaged under a microscope to verify efficient  
1303 lysis. (We suspect with larger sample volume:canister volume ratios, fewer cycles would  
1304 be necessary.)

1305 Lysates were loaded onto 10–50% sucrose gradients pre-poured on a BioComp  
1306 Gradient Master 108 (Fredericton, ND, Canada). Lysates generally contained RNA  
1307 concentrations around 12–18  $\mu\text{g}/\mu\text{L}$ . 30  $\mu\text{L}$  of lysate was carefully pipetted onto the top  
1308 of the sucrose gradient, and samples were spun in a Beckman SW41 Ti Rotor for 2.5  
1309 hours at 4°C at 40,000 rpm. Gradients were analyzed on Brandel fractionator  
1310 (Gaithersburg, MD). Technical replicates (same lysate independently loaded onto  
1311 separate gradients) showed a very high degree of similarity, as did biological replicates.

1312

1313 **GFP-fusion measurements.** Naïve or [*BIG*<sup>+</sup>] cells were mated to the SWAT seamless-  
1314 GFP library (Weill et al., 2018; Yofe et al., 2016) on solid YPD agar plates in 384-spot  
1315 format for 24 hours at room temperature. Diploids were selected on media lacking both  
1316 lysine and methionine (SD-Lys-Met) and propagated for 48 hour at room temperature.  
1317 Diploids were inncoulated into 60  $\mu\text{L}$  of liquid media lacking both lysine and methionine  
1318 (SD-Lys-Met) in 384-well plates. All library manipulations were carried out using a  
1319 Singer ROTOR HDA robotic pinning instrument. Cells were propagated in liquid medium  
1320 for 24 hours at 30°C ( $\text{OD}_{600} \sim 1$ ), at which time  $\text{OD}_{600}$  and green fluorescence were  
1321 measured using a BioTek Synergy H1 plate reader.  $\text{OD}_{600}$  was adjusted based on

1322 known blank wells, and the GFP/OD600 measurements were normalized by Z-score ( $(x$   
1323  $- \mu)/\sigma$ ) within the naïve and [*BIG*<sup>+</sup>] populations independently.

1324

1325 **Western blots.** For SDS-PAGE, immunoblots and protein yield measurements, cells  
1326 were lysed using a Retsch Cryomill using the following program: six 3-minute cycles at  
1327 15Hz with 2-minute cooling cycles in between. Cell lysates were loaded onto GenScript  
1328 ExpressPlus SDS-PAGE 4–20% gels (Piscataway, NJ) and stained using coomassie  
1329 blue. For Western Blots, anti-FLAG M2 monoclonal antibody (Sigma) was used to  
1330 detect 3XFLAG-Pus4, and anti-PGK1 monoclonal antibody (Invitrogen) was used to  
1331 detect the loading control.

1332

1333 **RNA-sequencing.** Five independent colonies of naïve and [*BIG*<sup>+</sup>] cells were grown in 5  
1334 mL YPD cultures on a culture roller drum wheel overnight at 30°C. Saturated cultures  
1335 were added to 700 mL YPD cultures in 2 L narrow mouthed baffled flasks, pre-  
1336 incubated to 30°C. These were grown until a cuvette reading of OD 1.0. (700 mL  
1337 cultures were used to provide enough material for other sample-intensive experiments  
1338 done in parallel). Cultures were pelleted in large table-top centrifuge with swing-bucket  
1339 rotor at 4300 x g at 4°C for 20 minutes, washing once with ice-cold 1X TBS. RNA was  
1340 harvested as described in (Carlile et al., 2015). Total RNA was treated with RiboZero  
1341 (Illumina, San Diego, CA) to remove most rRNAs but retain mRNAs and other ncRNAs.  
1342 RNA was fragmented and submitted for Illumina sequencing at the Beijing Genomics  
1343 Institute. Analysis was performed using Bowtie2 (Langmead and Salzberg, 2012), HT-

1344 Seq (Anders et al., 2015), and DE-Seq2 (Love et al., 2014). Raw data and other  
1345 experimental information are available on the Gene Expression Omnibus (Barrett et al.,  
1346 2013), accession:

1347 <https://www.ncbi.nlm.nih.gov/geo/query/acc.cgi?acc=GSE153930>  
1348

1349 **tRNA/rRNA quantification.** Strains were grown up in 5mL of YPD overnight at 30°C.  
1350 Saturated cultures were then diluted 15X into fresh media and grown up to an OD 0.8.  
1351 Cells were then pelleted, and total RNA was extracted by phenol-chloroform extraction.  
1352 RNA concentration for each sample was then analyzed on Nanodrop, and diluted to  
1353 equal concentrations in RNase-free water. The extracted RNA was then run on nucleic  
1354 acid fragment analyzer, and total tRNA abundance was quantified relative to abundance  
1355 of 5.8S rRNA.

1356  
1357 **Pseudouridine measurements.** Protocol adapted from reference (Lei and Yi, 2017).  
1358 For each sample, 40  $\mu$ g of total RNA was fragmented in RNA fragmentation buffer (New  
1359 England Bio Labs, Ipswich, MA) at 94°C for 3 min. Following ethanol precipitation,  
1360 fragmented RNA was resuspended in 80  $\mu$ L of 5 mM EDTA, denatured at 80°C for 5  
1361 min, and then immediately chilled on ice. Each sample was then split into two 40  $\mu$ L  
1362 samples for a CMC-labeled and non-labeled control. The 40  $\mu$ L RNA sample destined  
1363 for CMC-labeling was added to 400  $\mu$ L BEU+CMC buffer (50 mM Bicine, pH 8.5; 4 mM  
1364 EDTA; 7 M urea; 200 mM CMC (Sigma)). The non-labeled 40  $\mu$ L RNA sample was  
1365 added to 400 $\mu$ L BEu buffer (50 mM Bicine, pH 8.5; 4 mM EDTA; 7 M urea). Both  
1366 samples were incubated at 37°C for 20 min to carry out the CMC- $\Psi$  reaction, followed

1367 by an ethanol precipitation. Each sample was then resuspended in 200  $\mu$ L Na<sub>2</sub>CO<sub>3</sub>  
1368 buffer (50 mM Na<sub>2</sub>CO<sub>3</sub>, pH 10.4; 2 mM EDTA) and incubated at 37°C for 6 h. Following  
1369 incubation, RNA was ethanol precipitated and resuspended in 40  $\mu$ L H<sub>2</sub>O. RNA was  
1370 annealed to primers by the addition of 4  $\mu$ L 100  $\mu$ M Random Hexamer Primers  
1371 (TaKaRa, Mountain View, CA) and incubation at 65°C for 5 min. Samples were chilled  
1372 on ice afterwards. To perform the reverse transcription, 32  $\mu$ L RT Buffer (125 mM Tris,  
1373 pH 8.0; 15 mM MnCl<sub>2</sub>; 187.5 mM KCl; 1.25 mM dNTPs; 25mM DTT) was added to each  
1374 sample. Samples were then incubated at 25°C for 2 min. After, 0.5  $\mu$ L SuperScript II  
1375 reverse transcriptase (SSII, Invitrogen, Waltham, MA) was added to each sample  
1376 followed by incubation at 25°C for 10 min, 42°C for 3 h, and 70°C for 15 min. To perform  
1377 qPCR analysis, 2  $\mu$ L of sample was mixed with 10  $\mu$ L 2X SYBR Mix (Kapa Biosystems,  
1378 Wilmington, MA), 0.4  $\mu$ L of each 10  $\mu$ M primer (IDT, Coralville, IA), and 7.2  $\mu$ L H<sub>2</sub>O for  
1379 a total of 20  $\mu$ L for each reaction. qPCR was performed in a Bio-Rad CFX Connect  
1380 Real-Time System (Bio-Rad, Hercules, CA) using the following protocol: initial  
1381 incubation at 95°C for 5 min, followed by 45 cycles of 95°C for 0.5 min and 60°C for 1  
1382 min. Following amplification, reaction was brought down to 54°C and held for 5s,  
1383 increasing in temperature by 0.1°C increments until 95°C is reached to obtain melt  
1384 curve data.

1385

1386 **Data display.** Plots/graphs were made using PRISM 7/8 software (GraphPad, San  
1387 Diego, CA).

1388 **REFERENCES**

- 1389 Alberti, S., Halfmann, R., King, O., Kapila, A., and Lindquist, S. (2009). A systematic  
1390 survey identifies prions and illuminates sequence features of prionogenic proteins. *Cell*  
1391 *137*, 146-158.
- 1392 Ali, M., Chernova, T.A., Newnam, G.P., Yin, L., Shanks, J., Karpova, T.S., Lee, A., Laur,  
1393 O., Subramanian, S., Kim, D., *et al.* (2014). Stress-dependent proteolytic processing of  
1394 the actin assembly protein Lsb1 modulates a yeast prion. *J Biol Chem* *289*, 27625-  
1395 27639.
- 1396 Anders, S., Pyl, P.T., and Huber, W. (2015). HTSeq--a Python framework to work with  
1397 high-throughput sequencing data. *Bioinformatics* *31*, 166-169.
- 1398 Anzi, S., Stolovich-Rain, M., Klochendler, A., Fridlich, O., Helman, A., Paz-Sonnenfeld,  
1399 A., Avni-Magen, N., Kaufman, E., Ginzberg, M.B., Snider, D., *et al.* (2018). Postnatal  
1400 Exocrine Pancreas Growth by Cellular Hypertrophy Correlates with a Shorter Lifespan  
1401 in Mammals. *Dev Cell* *45*, 726-737 e723.
- 1402 Bailey, T.L., Boden, M., Buske, F.A., Frith, M., Grant, C.E., Clementi, L., Ren, J., Li,  
1403 W.W., and Noble, W.S. (2009). MEME SUITE: tools for motif discovery and searching.  
1404 *Nucleic acids research* *37*, W202-208.
- 1405 Baliga, B.S., Pronczuk, A.W., and Munro, H.N. (1969). Mechanism of cycloheximide  
1406 inhibition of protein synthesis in a cell-free system prepared from rat liver. *J Biol Chem*  
1407 *244*, 4480-4489.
- 1408 Barrett, T., Wilhite, S.E., Ledoux, P., Evangelista, C., Kim, I.F., Tomashevsky, M.,  
1409 Marshall, K.A., Phillippy, K.H., Sherman, P.M., Holko, M., *et al.* (2013). NCBI GEO:  
1410 archive for functional genomics data sets--update. *Nucleic acids research* *41*, D991-  
1411 995.
- 1412 Baudin-Baillieu, A., Legendre, R., Kuchly, C., Hatin, I., Demais, S., Mestdagh, C.,  
1413 Gautheret, D., and Namy, O. (2014). Genome-wide translational changes induced by  
1414 the prion [PSI<sup>+</sup>]. *Cell Rep* *8*, 439-448.
- 1415 Becker, H.F., Motorin, Y., Planta, R.J., and Grosjean, H. (1997). The yeast gene  
1416 YNL292w encodes a pseudouridine synthase (Pus4) catalyzing the formation of psi55 in  
1417 both mitochondrial and cytoplasmic tRNAs. *Nucleic acids research* *25*, 4493-4499.
- 1418 Beretta, L., Gingras, A.C., Svitkin, Y.V., Hall, M.N., and Sonenberg, N. (1996).  
1419 Rapamycin blocks the phosphorylation of 4E-BP1 and inhibits cap-dependent initiation  
1420 of translation. *EMBO J* *15*, 658-664.
- 1421 Bitto, A., Wang, A.M., Bennett, C.F., and Kaerberlein, M. (2015). Biochemical Genetic  
1422 Pathways that Modulate Aging in Multiple Species. *Cold Spring Harb Perspect Med* *5*.



- 1423 Bjedov, I., Toivonen, J.M., Kerr, F., Slack, C., Jacobson, J., Foley, A., and Partridge, L.  
1424 (2010). Mechanisms of life span extension by rapamycin in the fruit fly *Drosophila*  
1425 *melanogaster*. *Cell Metab* *11*, 35-46.
- 1426 Breslow, D.K., Cameron, D.M., Collins, S.R., Schuldiner, M., Stewart-Ornstein, J.,  
1427 Newman, H.W., Braun, S., Madhani, H.D., Krogan, N.J., and Weissman, J.S. (2008). A  
1428 comprehensive strategy enabling high-resolution functional analysis of the yeast  
1429 genome. *Nat Methods* *5*, 711-718.
- 1430 Broach, J.R. (2012). Nutritional control of growth and development in yeast. *Genetics*  
1431 *192*, 73-105.
- 1432 Brown, J.C., and Lindquist, S. (2009). A heritable switch in carbon source utilization  
1433 driven by an unusual yeast prion. *Genes Dev* *23*, 2320-2332.
- 1434 Butcher, R.A., Bhullar, B.S., Perlstein, E.O., Marsischky, G., LaBaer, J., and Schreiber,  
1435 S.L. (2006). Microarray-based method for monitoring yeast overexpression strains  
1436 reveals small-molecule targets in TOR pathway. *Nat Chem Biol* *2*, 103-109.
- 1437 Byers, J.S., and Jarosz, D.F. (2014). Pernicious pathogens or expedient elements of  
1438 inheritance: the significance of yeast prions. *PLoS Pathog* *10*, e1003992.
- 1439 Carlile, T.M., Rojas-Duran, M.F., and Gilbert, W.V. (2015). Pseudo-Seq: Genome-Wide  
1440 Detection of Pseudouridine Modifications in RNA. *Methods Enzymol* *560*, 219-245.
- 1441 Carlile, T.M., Rojas-Duran, M.F., Zinshteyn, B., Shin, H., Bartoli, K.M., and Gilbert, W.V.  
1442 (2014). Pseudouridine profiling reveals regulated mRNA pseudouridylation in yeast and  
1443 human cells. *Nature* *515*, 143-146.
- 1444 Carpenter, A.E., Jones, T.R., Lamprecht, M.R., Clarke, C., Kang, I.H., Friman, O.,  
1445 Guertin, D.A., Chang, J.H., Lindquist, R.A., Moffat, J., *et al.* (2006). CellProfiler: image  
1446 analysis software for identifying and quantifying cell phenotypes. *Genome Biol* *7*, R100.
- 1447 Catania, S., Dumesic, P.A., Pimentel, H., Nasif, A., Stoddard, C.I., Burke, J.E., Diedrich,  
1448 J.K., Cook, S., Shea, T., Geinger, E., *et al.* (2020). Evolutionary Persistence of DNA  
1449 Methylation for Millions of Years after Ancient Loss of a De Novo Methyltransferase.  
1450 *Cell* *180*, 263-277 e220.
- 1451 Chakrabortee, S., Byers, J.S., Jones, S., Garcia, D.M., Bhullar, B., Chang, A., She, R.,  
1452 Lee, L., Fremin, B., Lindquist, S., *et al.* (2016a). Intrinsically Disordered Proteins Drive  
1453 Emergence and Inheritance of Biological Traits. *Cell* *167*, 369-381 e312.
- 1454 Chakrabortee, S., Kayatekin, C., Newby, G.A., Mendillo, M.L., Lancaster, A., and  
1455 Lindquist, S. (2016b). Luminidependens (LD) is an Arabidopsis protein with prion  
1456 behavior. *Proc Natl Acad Sci U S A* *113*, 6065-6070.

- 1457 Chakravarty, A.K., Smejkal, T., Itakura, A.K., Garcia, D.M., and Jarosz, D.F. (2019). A  
1458 Non-amyloid Prion Particle that Activates a Heritable Gene Expression Program. *Mol*  
1459 *Cell*.
- 1460 Chernoff, Y.O., Lindquist, S.L., Ono, B., Inge-Vechtomov, S.G., and Liebman, S.W.  
1461 (1995). Role of the chaperone protein Hsp104 in propagation of the yeast prion-like  
1462 factor [psi+]. *Science* *268*, 880-884.
- 1463 Cherry, J.M., Hong, E.L., Amundsen, C., Balakrishnan, R., Binkley, G., Chan, E.T.,  
1464 Christie, K.R., Costanzo, M.C., Dwight, S.S., Engel, S.R., *et al.* (2012). *Saccharomyces*  
1465 *Genome Database: the genomics resource of budding yeast*. *Nucleic acids research* *40*,  
1466 D700-705.
- 1467 Chu, D., Kazana, E., Bellanger, N., Singh, T., Tuite, M.F., and von der Haar, T. (2014).  
1468 Translation elongation can control translation initiation on eukaryotic mRNAs. *EMBO J*  
1469 *33*, 21-34.
- 1470 Chung, J., Kuo, C.J., Crabtree, G.R., and Blenis, J. (1992). Rapamycin-FKBP  
1471 specifically blocks growth-dependent activation of and signaling by the 70 kd S6 protein  
1472 kinases. *Cell* *69*, 1227-1236.
- 1473 Cox, B.S. (1965). A cytoplasmic suppressor of a super-suppressor in yeast. *Heredity* *20*,  
1474 505–521.
- 1475 Cubillos, F.A., Louis, E.J., and Liti, G. (2009). Generation of a large set of genetically  
1476 tractable haploid and diploid *Saccharomyces* strains. *FEMS Yeast Res* *9*, 1217-1225.
- 1477 Dikicioglu, D., Dereli Eke, E., Eraslan, S., Oliver, S.G., and Kirdar, B. (2018).  
1478 *Saccharomyces cerevisiae* adapted to grow in the presence of low-dose rapamycin  
1479 exhibit altered amino acid metabolism. *Cell Commun Signal* *16*, 85.
- 1480 Dreher, T.W., Uhlenbeck, O.C., and Browning, K.S. (1999). Quantitative assessment of  
1481 EF-1alpha.GTP binding to aminoacyl-tRNAs, aminoacyl-viral RNA, and tRNA shows  
1482 close correspondence to the RNA binding properties of EF-Tu. *J Biol Chem* *274*, 666-  
1483 672.
- 1484 Dudley, A.M., Janse, D.M., Tanay, A., Shamir, R., and Church, G.M. (2005). A global  
1485 view of pleiotropy and phenotypically derived gene function in yeast. *Mol Syst Biol* *1*,  
1486 2005 0001.
- 1487 Eaglestone, S.S., Ruddock, L.W., Cox, B.S., and Tuite, M.F. (2000). Guanidine  
1488 hydrochloride blocks a critical step in the propagation of the prion-like determinant  
1489 [PSI(+)] of *Saccharomyces cerevisiae*. *Proc Natl Acad Sci U S A* *97*, 240-244.
- 1490 Ecker, R.E., and Schaechter, M. (1963). Ribosome Content and the Rate of Growth of  
1491 *Salmonella Typhimurium*. *Biochim Biophys Acta* *76*, 275-279.

- 1492 Efeyan, A., Comb, W.C., and Sabatini, D.M. (2015). Nutrient-sensing mechanisms and  
1493 pathways. *Nature* *517*, 302-310.
- 1494 Egilmez, N.K., Chen, J.B., and Jazwinski, S.M. (1990). Preparation and partial  
1495 characterization of old yeast cells. *J Gerontol* *45*, B9-17.
- 1496 Eyler, D.E., Franco, M.K., Batool, Z., Wu, M.Z., Dubuke, M.L., Dobosz-Bartoszek, M.,  
1497 Jones, J.D., Polikanov, Y.S., Roy, B., and Koutmou, K.S. (2019). Pseudouridylation of  
1498 mRNA coding sequences alters translation. *Proc Natl Acad Sci U S A* *116*, 23068-  
1499 23074.
- 1500 Fabrizio, P., Pozza, F., Pletcher, S.D., Gendron, C.M., and Longo, V.D. (2001).  
1501 Regulation of longevity and stress resistance by Sch9 in yeast. *Science* *292*, 288-290.
- 1502 Ferreira, P.C., Ness, F., Edwards, S.R., Cox, B.S., and Tuite, M.F. (2001). The  
1503 elimination of the yeast [PSI<sup>+</sup>] prion by guanidine hydrochloride is the result of Hsp104  
1504 inactivation. *Mol Microbiol* *40*, 1357-1369.
- 1505 Fingar, D.C., Salama, S., Tsou, C., Harlow, E., and Blenis, J. (2002). Mammalian cell  
1506 size is controlled by mTOR and its downstream targets S6K1 and 4EBP1/eIF4E. *Genes*  
1507 *Dev* *16*, 1472-1487.
- 1508 Fontana, L., Partridge, L., and Longo, V.D. (2010). Extending healthy life span--from  
1509 yeast to humans. *Science* *328*, 321-326.
- 1510 Frumkin, I., Lajoie, M.J., Gregg, C.J., Hornung, G., Church, G.M., and Pilpel, Y. (2018).  
1511 Codon usage of highly expressed genes affects proteome-wide translation efficiency.  
1512 *Proc Natl Acad Sci U S A* *115*, E4940-E4949.
- 1513 Garay, E., Campos, S.E., Gonzalez de la Cruz, J., Gaspar, A.P., Jinich, A., and Deluna,  
1514 A. (2014). High-resolution profiling of stationary-phase survival reveals yeast longevity  
1515 factors and their genetic interactions. *PLoS Genet* *10*, e1004168.
- 1516 Garcia, D.M., Dietrich, D., Clardy, J., and Jarosz, D.F. (2016). A common bacterial  
1517 metabolite elicits prion-based bypass of glucose repression. *Elife* *5*.
- 1518 Garcia, D.M., and Jarosz, D.F. (2014). Rebels with a cause: molecular features and  
1519 physiological consequences of yeast prions. *FEMS Yeast Res* *14*, 136-147.
- 1520 Gietz, D., St Jean, A., Woods, R.A., and Schiestl, R.H. (1992). Improved method for  
1521 high efficiency transformation of intact yeast cells. *Nucleic Acids Res* *20*, 1425.
- 1522 Gingold, H., and Pilpel, Y. (2011). Determinants of translation efficiency and accuracy.  
1523 *Mol Syst Biol* *7*, 481.
- 1524 Grewal, S.I., and Klar, A.J. (1996). Chromosomal inheritance of epigenetic states in  
1525 fission yeast during mitosis and meiosis. *Cell* *86*, 95-101.

- 1526 Gutsell, N., Englund, N., Niu, L., Kaya, Y., Lane, B.G., and Ofengand, J. (2000).  
1527 Deletion of the Escherichia coli pseudouridine synthase gene *truB* blocks formation of  
1528 pseudouridine 55 in tRNA in vivo, does not affect exponential growth, but confers a  
1529 strong selective disadvantage in competition with wild-type cells. *RNA* **6**, 1870-1881.
- 1530 Halfmann, R., Jarosz, D.F., Jones, S.K., Chang, A., Lancaster, A.K., and Lindquist, S.  
1531 (2012). Prions are a common mechanism for phenotypic inheritance in wild yeasts.  
1532 *Nature* **482**, 363-368.
- 1533 Hanahan, D., and Weinberg, R.A. (2011). Hallmarks of cancer: the next generation. *Cell*  
1534 **144**, 646-674.
- 1535 Harrison, D.E., Strong, R., Sharp, Z.D., Nelson, J.F., Astle, C.M., Flurkey, K., Nadon,  
1536 N.L., Wilkinson, J.E., Frenkel, K., Carter, C.S., *et al.* (2009). Rapamycin fed late in life  
1537 extends lifespan in genetically heterogeneous mice. *Nature* **460**, 392-395.
- 1538 Harvey, S.L., and Kellogg, D.R. (2003). Conservation of mechanisms controlling entry  
1539 into mitosis: budding yeast *wee1* delays entry into mitosis and is required for cell size  
1540 control. *Curr Biol* **13**, 264-275.
- 1541 Harvey, Z.H., Chen, Y., and Jarosz, D.F. (2018). Protein-Based Inheritance: Epigenetics  
1542 beyond the Chromosome. *Mol Cell* **69**, 195-202.
- 1543 He, C., Tsuchiyama, S.K., Nguyen, Q.T., Plyusnina, E.N., Terrill, S.R., Sahibzada, S.,  
1544 Patel, B., Faulkner, A.R., Shaposhnikov, M.V., Tian, R., *et al.* (2014). Enhanced  
1545 longevity by ibuprofen, conserved in multiple species, occurs in yeast through inhibition  
1546 of tryptophan import. *PLoS Genet* **10**, e1004860.
- 1547 Heard, E., and Martienssen, R.A. (2014). Transgenerational epigenetic inheritance:  
1548 myths and mechanisms. *Cell* **157**, 95-109.
- 1549 Hughes, K.A., and Reynolds, R.M. (2005). Evolutionary and mechanistic theories of  
1550 aging. *Annu Rev Entomol* **50**, 421-445.
- 1551 Huh, W.K., Falvo, J.V., Gerke, L.C., Carroll, A.S., Howson, R.W., Weissman, J.S., and  
1552 O'Shea, E.K. (2003). Global analysis of protein localization in budding yeast. *Nature*  
1553 **425**, 686-691.
- 1554 Itakura, A.K., Chakravarty, A.K., Jakobson, C.M., and Jarosz, D.F. (2019). Widespread  
1555 Prion-Based Control of Growth and Differentiation Strategies in *Saccharomyces*  
1556 *cerevisiae*. *Mol Cell*.
- 1557 Ivanov, D.K., Escott-Price, V., Ziehm, M., Magwire, M.M., Mackay, T.F., Partridge, L.,  
1558 and Thornton, J.M. (2015). Longevity GWAS Using the Drosophila Genetic Reference  
1559 Panel. *J Gerontol A Biol Sci Med Sci* **70**, 1470-1478.

- 1560 Jakobson, C.M., and Jarosz, D.F. (2019). Molecular Origins of Complex Heritability in  
1561 Natural Genotype-to-Phenotype Relationships. *Cell Syst* *8*, 363-379 e363.
- 1562 Jakobson, C.M., She, R., and Jarosz, D.F. (2019). Pervasive function and evidence for  
1563 selection across standing genetic variation in *S. cerevisiae*. *Nat Commun* *10*, 1222.
- 1564 Jan, C.H., Williams, C.C., and Weissman, J.S. (2014). Principles of ER cotranslational  
1565 translocation revealed by proximity-specific ribosome profiling. *Science* *346*, 1257521.
- 1566 Janssens, G.E., Meinema, A.C., Gonzalez, J., Wolters, J.C., Schmidt, A., Guryev, V.,  
1567 Bischoff, R., Wit, E.C., Veenhoff, L.M., and Heinemann, M. (2015). Protein biogenesis  
1568 machinery is a driver of replicative aging in yeast. *Elife* *4*, e08527.
- 1569 Jarosz, D.F., Lancaster, A.K., Brown, J.C.S., and Lindquist, S. (2014). An evolutionarily  
1570 conserved prion-like element converts wild fungi from metabolic specialists to  
1571 generalists. *Cell* *158*, 1072-1082.
- 1572 Johnston, G.C., Pringle, J.R., and Hartwell, L.H. (1977). Coordination of growth with cell  
1573 division in the yeast *Saccharomyces cerevisiae*. *Exp Cell Res* *105*, 79-98.
- 1574 Jorgensen, P., Nishikawa, J.L., Breikreutz, B.J., and Tyers, M. (2002). Systematic  
1575 identification of pathways that couple cell growth and division in yeast. *Science* *297*,  
1576 395-400.
- 1577 Jorgensen, P., and Tyers, M. (2004). How cells coordinate growth and division. *Curr*  
1578 *Biol* *14*, R1014-1027.
- 1579 Jung, P.P., Zhang, Z., Paczia, N., Jaeger, C., Ignac, T., May, P., and Linster, C.L.  
1580 (2018). Natural variation of chronological aging in the *Saccharomyces cerevisiae*  
1581 species reveals diet-dependent mechanisms of life span control. *NPJ Aging Mech Dis* *4*,  
1582 3.
- 1583 Kabani, M., Redeker, V., and Melki, R. (2014). A role for the proteasome in the turnover  
1584 of Sup35p and in [PSI(+)] prion propagation. *Mol Microbiol* *92*, 507-528.
- 1585 Kaeberlein, M. (2010). Lessons on longevity from budding yeast. *Nature* *464*, 513-519.
- 1586 Kaeberlein, M., and Kennedy, B.K. (2007). Protein translation, 2007. *Aging Cell* *6*, 731-  
1587 734.
- 1588 Kaeberlein, M., Kirkland, K.T., Fields, S., and Kennedy, B.K. (2005). Genes determining  
1589 yeast replicative life span in a long-lived genetic background. *Mech Ageing Dev* *126*,  
1590 491-504.
- 1591 Kaeberlein, M., McVey, M., and Guarente, L. (1999). The SIR2/3/4 complex and SIR2  
1592 alone promote longevity in *Saccharomyces cerevisiae* by two different mechanisms.  
1593 *Genes Dev* *13*, 2570-2580.

- 1594 Kafri, M., Metzli-Raz, E., Jona, G., and Barkai, N. (2016). The Cost of Protein  
1595 Production. *Cell Rep* 14, 22-31.
- 1596 Kapitzky, L., Beltrao, P., Berens, T.J., Gassner, N., Zhou, C., Wuster, A., Wu, J., Babu,  
1597 M.M., Elledge, S.J., Toczyski, D., *et al.* (2010). Cross-species chemogenomic profiling  
1598 reveals evolutionarily conserved drug mode of action. *Mol Syst Biol* 6, 451.
- 1599 Kariko, K., Muramatsu, H., Welsh, F.A., Ludwig, J., Kato, H., Akira, S., and Weissman,  
1600 D. (2008). Incorporation of pseudouridine into mRNA yields superior nonimmunogenic  
1601 vector with increased translational capacity and biological stability. *Mol Ther* 16, 1833-  
1602 1840.
- 1603 Kaya, A., Ma, S., Wasko, B., Lee, M., Kaerberlein, M., and Gladyshev, V.N. (2015).  
1604 Defining Molecular Basis for Longevity Traits in Natural Yeast Isolates. *NPJ Aging Mech*  
1605 *Dis* 1.
- 1606 Keffer-Wilkes, L.C., Veerareddygar, G.R., and Kothe, U. (2016). RNA modification  
1607 enzyme TruB is a tRNA chaperone. *Proc Natl Acad Sci U S A* 113, 14306-14311.
- 1608 Kenyon, C.J. (2010). The genetics of ageing. *Nature* 464, 504-512.
- 1609 Kertesz, M., Wan, Y., Mazor, E., Rinn, J.L., Nutter, R.C., Chang, H.Y., and Segal, E.  
1610 (2010). Genome-wide measurement of RNA secondary structure in yeast. *Nature* 467,  
1611 103-107.
- 1612 King, O.D., and Masel, J. (2007). The evolution of bet-hedging adaptations to rare  
1613 scenarios. *Theor Popul Biol* 72, 560-575.
- 1614 Krogan, N.J., Cagney, G., Yu, H., Zhong, G., Guo, X., Ignatchenko, A., Li, J., Pu, S.,  
1615 Datta, N., Tikuisis, A.P., *et al.* (2006). Global landscape of protein complexes in the  
1616 yeast *Saccharomyces cerevisiae*. *Nature* 440, 637-643.
- 1617 Kuo, C.J., Chung, J., Fiorentino, D.F., Flanagan, W.M., Blenis, J., and Crabtree, G.R.  
1618 (1992). Rapamycin selectively inhibits interleukin-2 activation of p70 S6 kinase. *Nature*  
1619 358, 70-73.
- 1620 Kwan, E.X., Foss, E., Kruglyak, L., and Bedalov, A. (2011). Natural polymorphism in  
1621 BUL2 links cellular amino acid availability with chronological aging and telomere  
1622 maintenance in yeast. *PLoS Genet* 7, e1002250.
- 1623 Kyte, J., and Doolittle, R.F. (1982). A simple method for displaying the hydrophobic  
1624 character of a protein. *J Mol Biol* 157, 105-132.
- 1625 Lagaudriere-Gesbert, C., Newmyer, S.L., Gregers, T.F., Bakke, O., and Ploegh, H.L.  
1626 (2002). Uncoating ATPase Hsc70 is recruited by invariant chain and controls the size of  
1627 endocytic compartments. *Proc Natl Acad Sci U S A* 99, 1515-1520.

- 1628 Landry, C.R., Townsend, J.P., Hartl, D.L., and Cavalieri, D. (2006). Ecological and  
1629 evolutionary genomics of *Saccharomyces cerevisiae*. *Mol Ecol* *15*, 575-591.
- 1630 Langmead, B., and Salzberg, S.L. (2012). Fast gapped-read alignment with Bowtie 2.  
1631 *Nat Methods* *9*, 357-359.
- 1632 Lei, Z., and Yi, C. (2017). A Radiolabeling-Free, qPCR-Based Method for Locus-  
1633 Specific Pseudouridine Detection. *Angew Chem Int Ed Engl* *56*, 14878-14882.
- 1634 Li, C., Qian, W., Maclean, C.J., and Zhang, J. (2016). The fitness landscape of a tRNA  
1635 gene. *Science* *352*, 837-840.
- 1636 Li, L., and Kowal, A.S. (2012). Environmental regulation of prions in yeast. *PLoS Pathog*  
1637 *8*, e1002973.
- 1638 Liebman, S.W., and Chernoff, Y.O. (2012). Prions in yeast. *Genetics* *191*, 1041-1072.
- 1639 Lloyd, A.C. (2013). The regulation of cell size. *Cell* *154*, 1194-1205.
- 1640 Longo, V.D., Shadel, G.S., Kaeberlein, M., and Kennedy, B. (2012). Replicative and  
1641 chronological aging in *Saccharomyces cerevisiae*. *Cell Metab* *16*, 18-31.
- 1642 Love, M.I., Huber, W., and Anders, S. (2014). Moderated estimation of fold change and  
1643 dispersion for RNA-seq data with DESeq2. *Genome Biol* *15*, 550.
- 1644 Lovejoy, A.F., Riordan, D.P., and Brown, P.O. (2014). Transcriptome-wide mapping of  
1645 pseudouridines: pseudouridine synthases modify specific mRNAs in *S. cerevisiae*.  
1646 *PLoS One* *9*, e110799.
- 1647 Marek, A., and Korona, R. (2013). Restricted pleiotropy facilitates mutational erosion of  
1648 major life-history traits. *Evolution* *67*, 3077-3086.
- 1649 Martinez-Outschoorn, U.E., Peiris-Pages, M., Pestell, R.G., Sotgia, F., and Lisanti, M.P.  
1650 (2017). Cancer metabolism: a therapeutic perspective. *Nat Rev Clin Oncol* *14*, 11-31.
- 1651 McCormick, M.A., Delaney, J.R., Tsuchiya, M., Tsuchiyama, S., Shemorry, A., Sim, S.,  
1652 Chou, A.C., Ahmed, U., Carr, D., Murakami, C.J., *et al.* (2015). A Comprehensive  
1653 Analysis of Replicative Lifespan in 4,698 Single-Gene Deletion Strains Uncovers  
1654 Conserved Mechanisms of Aging. *Cell Metab* *22*, 895-906.
- 1655 McKeehan, W., and Hardesty, B. (1969). The mechanism of cycloheximide inhibition of  
1656 protein synthesis in rabbit reticulocytes. *Biochem Biophys Res Commun* *36*, 625-630.
- 1657 McKinley, M.P., Bolton, D.C., and Prusiner, S.B. (1983). A protease-resistant protein is  
1658 a structural component of the scrapie prion. *Cell* *35*, 57-62.

- 1659 Moazed, D. (2011). Mechanisms for the inheritance of chromatin states. *Cell* *146*, 510-  
1660 518.
- 1661 Murakami, C.J., Wall, V., Basisty, N., and Kaeberlein, M. (2011). Composition and  
1662 acidification of the culture medium influences chronological aging similarly in vineyard  
1663 and laboratory yeast. *PLoS One* *6*, e24530.
- 1664 Nakamoto, M.A., Lovejoy, A.F., Cygan, A.M., and Boothroyd, J.C. (2017). mRNA  
1665 pseudouridylation affects RNA metabolism in the parasite *Toxoplasma gondii*. *RNA* *23*,  
1666 1834-1849.
- 1667 Nakayama, J., Klar, A.J., and Grewal, S.I. (2000). A chromodomain protein, Swi6,  
1668 performs imprinting functions in fission yeast during mitosis and meiosis. *Cell* *101*, 307-  
1669 317.
- 1670 Neurohr, G.E., Terry, R.L., Lengefeld, J., Bonney, M., Brittingham, G.P., Moretto, F.,  
1671 Miettinen, T.P., Vaites, L.P., Soares, L.M., Paulo, J.A., *et al.* (2019). Excessive Cell  
1672 Growth Causes Cytoplasm Dilution And Contributes to Senescence. *Cell* *176*, 1083-  
1673 1097 e1018.
- 1674 Noll, H. (2008). The discovery of polyribosomes. *Bioessays* *30*, 1220-1234.
- 1675 Perlstein, D.L., Ge, J., Ortigosa, A.D., Robblee, J.H., Zhang, Z., Huang, M., and Stubbe,  
1676 J. (2005). The active form of the *Saccharomyces cerevisiae* ribonucleotide reductase  
1677 small subunit is a heterodimer in vitro and in vivo. *Biochemistry* *44*, 15366-15377.
- 1678 Pitt, J.N., and Kaeberlein, M. (2015). Why is aging conserved and what can we do  
1679 about it? *PLoS Biol* *13*, e1002131.
- 1680 Plotkin, J.B., and Kudla, G. (2011). Synonymous but not the same: the causes and  
1681 consequences of codon bias. *Nat Rev Genet* *12*, 32-42.
- 1682 Polymenis, M., and Schmidt, E.V. (1997). Coupling of cell division to cell growth by  
1683 translational control of the G1 cyclin CLN3 in yeast. *Genes Dev* *11*, 2522-2531.
- 1684 Powers, R.W., 3rd, Kaeberlein, M., Caldwell, S.D., Kennedy, B.K., and Fields, S.  
1685 (2006). Extension of chronological life span in yeast by decreased TOR pathway  
1686 signaling. *Genes Dev* *20*, 174-184.
- 1687 Price, D.J., Grove, J.R., Calvo, V., Avruch, J., and Bierer, B.E. (1992). Rapamycin-  
1688 induced inhibition of the 70-kilodalton S6 protein kinase. *Science* *257*, 973-977.
- 1689 Robichaud, N., Sonenberg, N., Ruggero, D., and Schneider, R.J. (2019). Translational  
1690 Control in Cancer. *Cold Spring Harb Perspect Biol* *11*.
- 1691 Robida-Stubbs, S., Glover-Cutter, K., Lamming, D.W., Mizunuma, M., Narasimhan,  
1692 S.D., Neumann-Haefelin, E., Sabatini, D.M., and Blackwell, T.K. (2012). TOR signaling



- 1693 and rapamycin influence longevity by regulating SKN-1/Nrf and DAF-16/FoxO. *Cell*  
1694 *Metab* *15*, 713-724.
- 1695 Safra, M., Nir, R., Farouq, D., Vainberg Slutskin, I., and Schwartz, S. (2017). TRUB1 is  
1696 the predominant pseudouridine synthase acting on mammalian mRNA via a predictable  
1697 and conserved code. *Genome Res* *27*, 393-406.
- 1698 Sarin, L.P., and Leidel, S.A. (2014). Modify or die?--RNA modification defects in  
1699 metazoans. *RNA Biol* *11*, 1555-1567.
- 1700 Saxton, R.A., and Sabatini, D.M. (2017). mTOR Signaling in Growth, Metabolism, and  
1701 Disease. *Cell* *168*, 960-976.
- 1702 Schaechter, M., Maaloe, O., and Kjeldgaard, N.O. (1958). Dependency on medium and  
1703 temperature of cell size and chemical composition during balanced grown of *Salmonella*  
1704 *typhimurium*. *J Gen Microbiol* *19*, 592-606.
- 1705 Schirmaier, F., and Philippsen, P. (1984). Identification of two genes coding for the  
1706 translation elongation factor EF-1 alpha of *S. cerevisiae*. *EMBO J* *3*, 3311-3315.
- 1707 Schito, L., and Semenza, G.L. (2016). Hypoxia-Inducible Factors: Master Regulators of  
1708 Cancer Progression. *Trends Cancer* *2*, 758-770.
- 1709 Schwartz, S., Bernstein, D.A., Mumbach, M.R., Jovanovic, M., Herbst, R.H., Leon-  
1710 Ricardo, B.X., Engreitz, J.M., Guttman, M., Satija, R., Lander, E.S., *et al.* (2014).  
1711 Transcriptome-wide mapping reveals widespread dynamic-regulated pseudouridylation  
1712 of ncRNA and mRNA. *Cell* *159*, 148-162.
- 1713 Sharon, E., Chen, S.A., Khosla, N.M., Smith, J.D., Pritchard, J.K., and Fraser, H.B.  
1714 (2018). Functional Genetic Variants Revealed by Massively Parallel Precise Genome  
1715 Editing. *Cell* *175*, 544-557 e516.
- 1716 She, R., and Jarosz, D.F. (2018). Mapping Causal Variants with Single-Nucleotide  
1717 Resolution Reveals Biochemical Drivers of Phenotypic Change. *Cell* *172*, 478-490  
1718 e415.
- 1719 Shorter, J., and Lindquist, S. (2004). Hsp104 catalyzes formation and elimination of self-  
1720 replicating Sup35 prion conformers. *Science* *304*, 1793-1797.
- 1721 Shorter, J., and Lindquist, S. (2005). Prions as adaptive conduits of memory and  
1722 inheritance. *Nat Rev Genet* *6*, 435-450.
- 1723 Singh, A., Helms, C., and Sherman, F. (1979). Mutation of the non-Mendelian  
1724 suppressor, Psi, in yeast by hypertonic media. *Proc Natl Acad Sci U S A* *76*, 1952-1956.
- 1725 Sonenberg, N. (1993). Translation factors as effectors of cell growth and tumorigenesis.  
1726 *Curr Opin Cell Biol* *5*, 955-960.

- 1727 Sonenberg, N., and Hinnebusch, A.G. (2009). Regulation of translation initiation in  
1728 eukaryotes: mechanisms and biological targets. *Cell* *136*, 731-745.
- 1729 Steffen, K.K., and Dillin, A. (2016). A Ribosomal Perspective on Proteostasis and Aging.  
1730 *Cell Metab* *23*, 1004-1012.
- 1731 Steffen, K.K., Kennedy, B.K., and Kaerberlein, M. (2009). Measuring replicative life span  
1732 in the budding yeast. *J Vis Exp*.
- 1733 Storici, F., and Resnick, M.A. (2006). The delitto perfetto approach to in vivo site-  
1734 directed mutagenesis and chromosome rearrangements with synthetic oligonucleotides  
1735 in yeast. *Methods Enzymol* *409*, 329-345.
- 1736 Su, T.T., and O'Farrell, P.H. (1998). Size control: cell proliferation does not equal  
1737 growth. *Curr Biol* *8*, R687-689.
- 1738 Suzuki, G., Shimazu, N., and Tanaka, M. (2012). A yeast prion, Mod5, promotes  
1739 acquired drug resistance and cell survival under environmental stress. *Science* *336*,  
1740 355-359.
- 1741 Tanenbaum, M.E., Stern-Ginossar, N., Weissman, J.S., and Vale, R.D. (2015).  
1742 Regulation of mRNA translation during mitosis. *Elife* *4*.
- 1743 Terada, N., Patel, H.R., Takase, K., Kohno, K., Nairn, A.C., and Gelfand, E.W. (1994).  
1744 Rapamycin selectively inhibits translation of mRNAs encoding elongation factors and  
1745 ribosomal proteins. *Proc Natl Acad Sci U S A* *91*, 11477-11481.
- 1746 Tuite, M.F., Mundy, C.R., and Cox, B.S. (1981). Agents that cause a high frequency of  
1747 genetic change from [psi+] to [psi-] in *Saccharomyces cerevisiae*. *Genetics* *98*, 691-711.
- 1748 Tuller, T., Carmi, A., Vestsigian, K., Navon, S., Dorfan, Y., Zaborske, J., Pan, T., Dahan,  
1749 O., Furman, I., and Pilpel, Y. (2010). An evolutionarily conserved mechanism for  
1750 controlling the efficiency of protein translation. *Cell* *141*, 344-354.
- 1751 Turner, J.J., Ewald, J.C., and Skotheim, J.M. (2012). Cell size control in yeast. *Curr Biol*  
1752 *22*, R350-359.
- 1753 Urban, J., Soulard, A., Huber, A., Lippman, S., Mukhopadhyay, D., Deloche, O., Wanke,  
1754 V., Anrather, D., Ammerer, G., Riezman, H., *et al.* (2007). Sch9 is a major target of  
1755 TORC1 in *Saccharomyces cerevisiae*. *Mol Cell* *26*, 663-674.
- 1756 Vallen, E.A., Hiller, M.A., Scherson, T.Y., and Rose, M.D. (1992). Separate domains of  
1757 KAR1 mediate distinct functions in mitosis and nuclear fusion. *J Cell Biol* *117*, 1277-  
1758 1287.
- 1759 Varlakhanova, N.V., Tornabene, B.A., and Ford, M.G.J. (2018). Feedback regulation of  
1760 TORC1 by its downstream effectors Npr1 and Par32. *Mol Biol Cell* *29*, 2751-2765.

- 1761 Wang, M., Liu, H., Zheng, J., Chen, B., Zhou, M., Fan, W., Wang, H., Liang, X., Zhou,  
1762 X., Eriani, G., *et al.* (2016). A Deafness- and Diabetes-associated tRNA Mutation  
1763 Causes Deficient Pseudouridylation at Position 55 in tRNAGlu and Mitochondrial  
1764 Dysfunction. *J Biol Chem* *291*, 21029-21041.
- 1765 Warner, J.R., and Knopf, P.M. (2002). The discovery of polyribosomes. *Trends in*  
1766 *biochemical sciences* *27*, 376-380.
- 1767 Wasko, B.M., Carr, D.T., Tung, H., Doan, H., Schurman, N., Neault, J.R., Feng, J., Lee,  
1768 J., Zipkin, B., Mouser, J., *et al.* (2013). Buffering the pH of the culture medium does not  
1769 extend yeast replicative lifespan. *F1000Res* *2*, 216.
- 1770 Weill, U., Yofe, I., Sass, E., Stynen, B., Davidi, D., Natarajan, J., Ben-Menachem, R.,  
1771 Avihou, Z., Goldman, O., Harpaz, N., *et al.* (2018). Genome-wide SWAp-Tag yeast  
1772 libraries for proteome exploration. *Nat Methods* *15*, 617-622.
- 1773 Werner-Washburne, M., Becker, J., Kosic-Smithers, J., and Craig, E.A. (1989). Yeast  
1774 Hsp70 RNA levels vary in response to the physiological status of the cell. *J Bacteriol*  
1775 *171*, 2680-2688.
- 1776 Werner-Washburne, M., and Craig, E.A. (1989). Expression of members of the  
1777 *Saccharomyces cerevisiae* hsp70 multigene family. *Genome* *31*, 684-689.
- 1778 Wickner, R.B. (1994). [URE3] as an altered URE2 protein: evidence for a prion analog  
1779 in *Saccharomyces cerevisiae*. *Science* *264*, 566-569.
- 1780 Wickner, R.B. (2016). Yeast and Fungal Prions. *Cold Spring Harb Perspect Biol* *8*.
- 1781 Yang, J., Dungrawala, H., Hua, H., Manukyan, A., Abraham, L., Lane, W., Mead, H.,  
1782 Wright, J., and Schneider, B.L. (2011). Cell size and growth rate are major determinants  
1783 of replicative lifespan. *Cell Cycle* *10*, 144-155.
- 1784 Yofe, I., Weill, U., Meurer, M., Chuartzman, S., Zalckvar, E., Goldman, O., Ben-Dor, S.,  
1785 Schutze, C., Wiedemann, N., Knop, M., *et al.* (2016). One library to make them all:  
1786 streamlining the creation of yeast libraries via a SWAp-Tag strategy. *Nat Methods* *13*,  
1787 371-378.
- 1788 Yuan, A.H., and Hochschild, A. (2017). A bacterial global regulator forms a prion.  
1789 *Science* *355*, 198-201.
- 1790 Zadrag-Tecza, R., Kwolek-Mirek, M., Bartosz, G., and Bilinski, T. (2009). Cell volume as  
1791 a factor limiting the replicative lifespan of the yeast *Saccharomyces cerevisiae*.  
1792 *Biogerontology* *10*, 481-488.
- 1793 Zaringhalam, M., and Papavasiliou, F.N. (2016). Pseudouridylation meets next-  
1794 generation sequencing. *Methods* *107*, 63-72.

1795 Zhang, H., Stallock, J.P., Ng, J.C., Reinhard, C., and Neufeld, T.P. (2000). Regulation  
1796 of cellular growth by the *Drosophila* target of rapamycin dTOR. *Genes Dev* *14*, 2712-  
1797 2724.

1798 Zhao, B.S., Roundtree, I.A., and He, C. (2017). Post-transcriptional gene regulation by  
1799 mRNA modifications. *Nat Rev Mol Cell Biol* *18*, 31-42.

1800 Zucchini, C., Strippoli, P., Biolchi, A., Solmi, R., Lenzi, L., D'Addabbo, P., Carinci, P.,  
1801 and Valvassori, L. (2003). The human TruB family of pseudouridine synthase genes,  
1802 including the Dyskeratosis Congenita 1 gene and the novel member TRUB1. *Int J Mol*  
1803 *Med* *11*, 697-704.

1804
